# Supplementary material for: Genome-Wide Identification and Analysis of Lbd Transcription Factor Genes in Jatropha curcas and Related Species
Source: MDPI journal article supplement (doi:10.3390/plants11182397), 2022-09-14
Supplement: s1 [file s1]

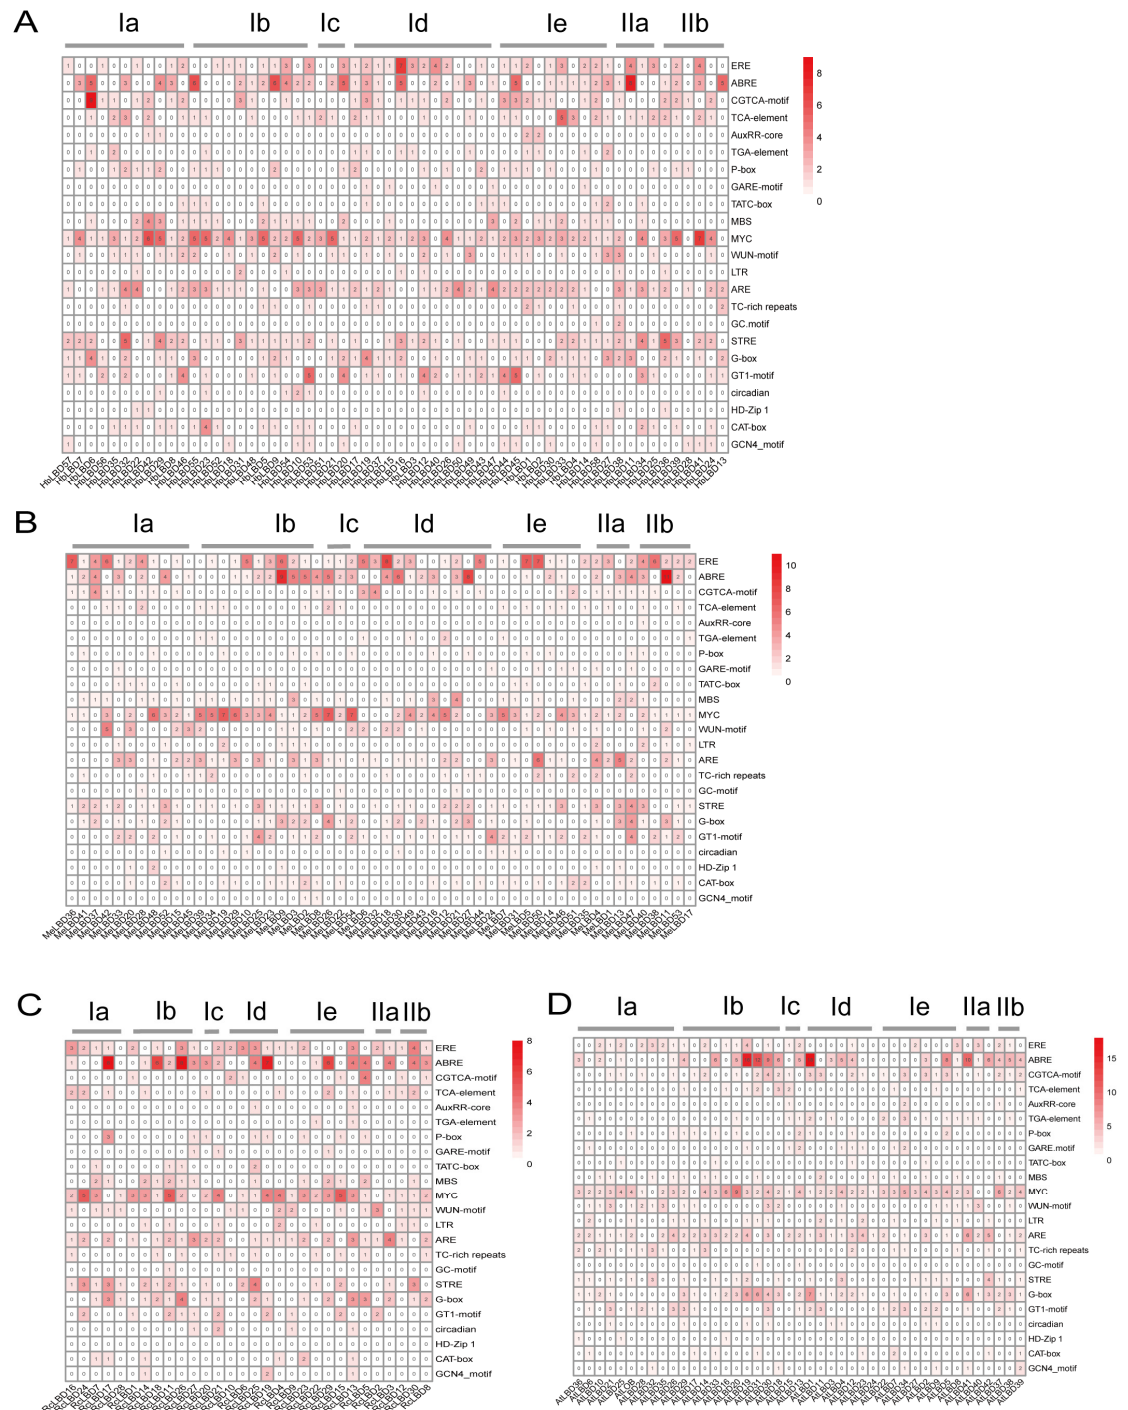

**Figure S2.** Cis-acting element matrix identified in the 1500-bp upstream promoters of each *LBD* genes. A, B, C and D represent rubber tree, cassava, castor, and *A. thaliana*, respectively.

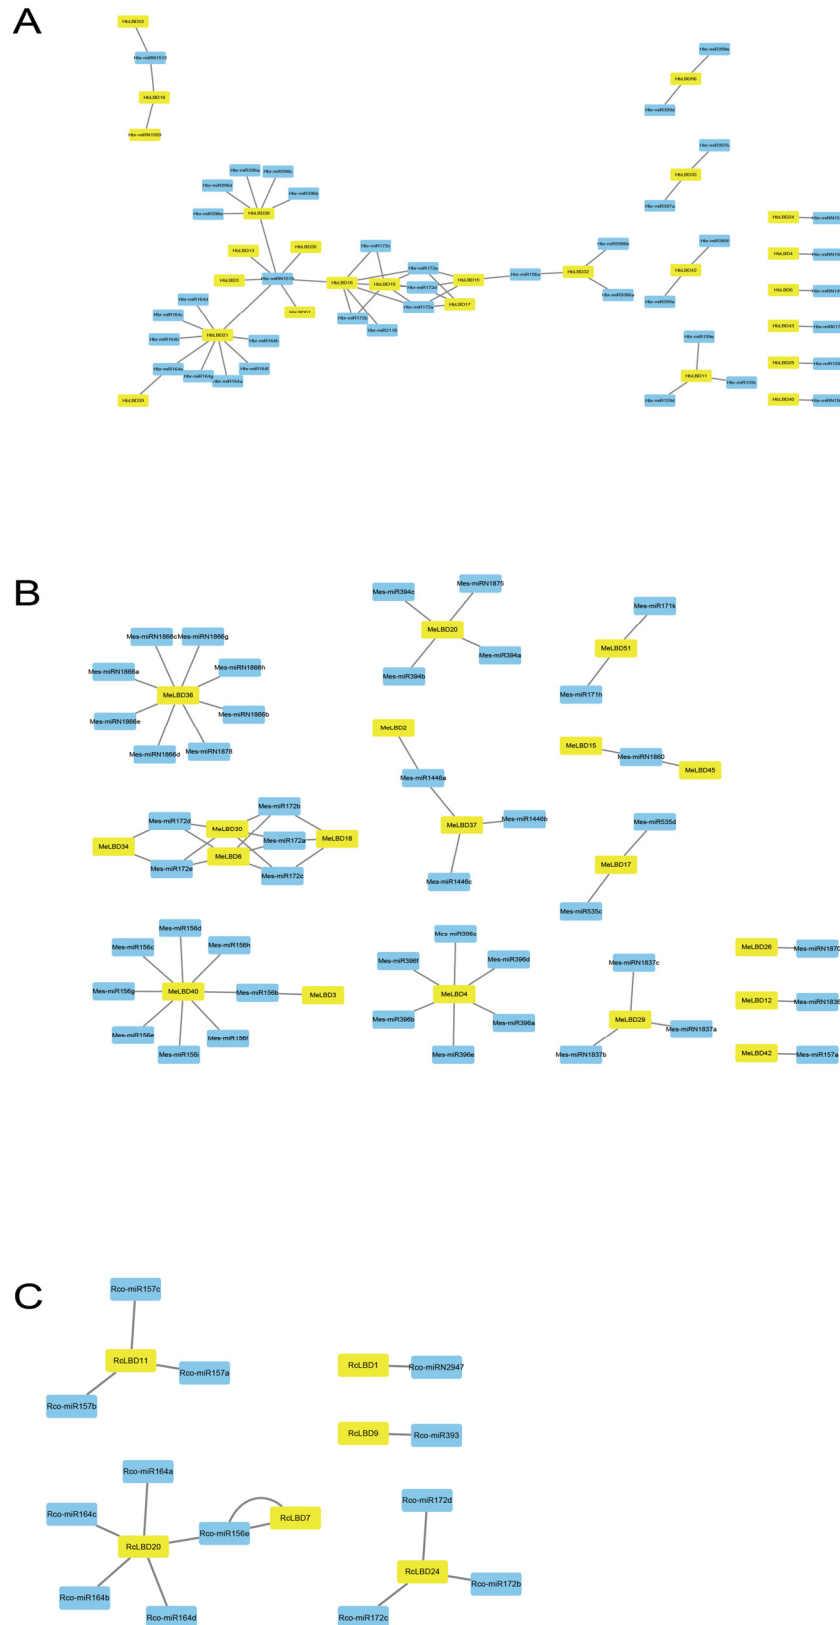

**Figure S3.** Network between the miRNAs and their targeted *LBD* genes. The blue and yellow rectangles indicate miRNAs and target genes, respectively. A, B, and C represent rubber tree, cassava, and castor, respectively.

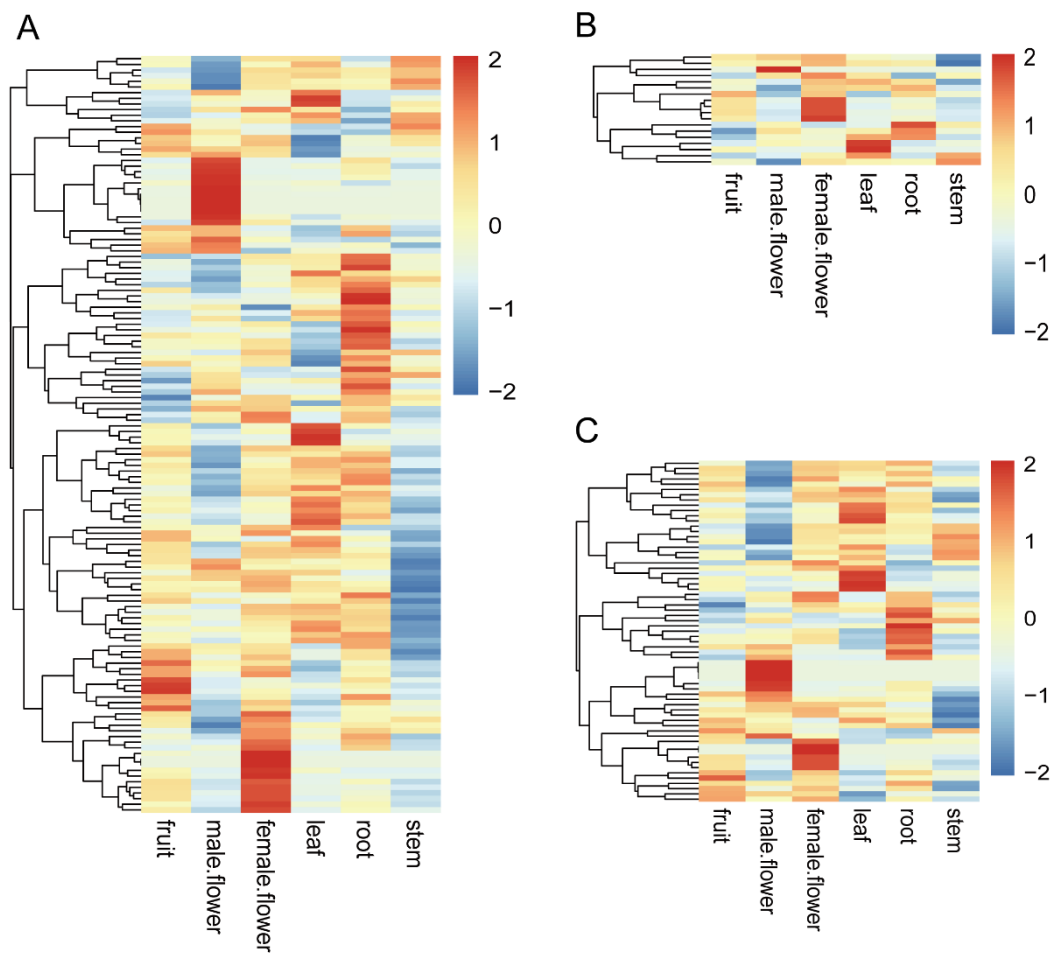

**Figure S4.** Tissue expression patterns of JcLBD target genes. A-C are the downstream target genes of JcLBD27, JcLBD24 and JcLBD22, respectively.

**Table S1.** Basic information of *LBD* genes of Euphorbiaceae

| Gene Name | Protein ID     | Gene ID      | Chrom Name     | Start   | End     | Strand | Size(aa) | MW       | pI   | A.I.  | Instability | GRAVY  |
|-----------|----------------|--------------|----------------|---------|---------|--------|----------|----------|------|-------|-------------|--------|
| HbLBD1    | XP_021684898.1 | LOC110668103 | NW_018745707.1 | 3646668 | 3648545 | +      | 250      | 28786.52 | 5.24 | 87.36 | 58.23       | -0.532 |
| HbLBD2    | XP_021684970.1 | LOC110668150 | NW_018745707.1 | 3694109 | 3696047 | +      | 250      | 28787.5  | 5.15 | 87.36 | 59.77       | -0.532 |
| HbLBD3    | XP_021639540.1 | LOC110634723 | NW_018745719.1 | 1470523 | 1473927 | -      | 169      | 18424.02 | 8.6  | 77.87 | 62.86       | -0.215 |
| HbLBD4    | XP_021665987.1 | LOC110654342 | NW_018745762.1 | 450010  | 452402  | +      | 260      | 29575    | 6.58 | 67.96 | 59.13       | -0.701 |
| HbLBD5    | XP_021667818.1 | LOC110655692 | NW_018745787.1 | 1770063 | 1771564 | -      | 243      | 26647.88 | 5.81 | 75.1  | 66.58       | -0.373 |
| HbLBD6    | XP_021668033.1 | LOC110655868 | NW_018745789.1 | 560019  | 563365  | -      | 321      | 36151.52 | 6.64 | 63.27 | 74.38       | -0.74  |
| HbLBD7    | XP_021668010.1 | LOC110655852 | NW_018745789.1 | 572879  | 573829  | -      | 299      | 33464.61 | 6.66 | 69.57 | 57.36       | -0.594 |
| HbLBD8    | XP_021668362.1 | LOC110656096 | NW_018745792.1 | 1662974 | 1665246 | -      | 185      | 20387.97 | 6.81 | 60.22 | 63.94       | -0.544 |
| HbLBD9    | XP_021668577.1 | LOC110656244 | NW_018745794.1 | 307999  | 311060  | -      | 205      | 22215.33 | 8.71 | 86.15 | 46.89       | -0.078 |
| HbLBD10   | XP_021668578.1 | LOC110656245 | NW_018745794.1 | 318613  | 321422  | +      | 248      | 25589.79 | 8.14 | 70.04 | 76.95       | -0.15  |
| HbLBD11   | XP_021675368.1 | LOC110661113 | NW_018745888.1 | 1297344 | 1298978 | -      | 296      | 32023.5  | 8.33 | 84.02 | 44.1        | -0.276 |
| HbLBD12   | XP_021676589.1 | LOC110662022 | NW_018745911.1 | 1527460 | 1530624 | +      | 146      | 15973.13 | 6.88 | 75.48 | 54.7        | -0.263 |
| HbLBD13   | XP_021677864.1 | LOC110662995 | NW_018745937.1 | 1455058 | 1456026 | +      | 218      | 23750.18 | 5.76 | 81.83 | 53.9        | -0.089 |
| HbLBD14   | XP_021679170.1 | LOC110663972 | NW_018745966.1 | 236175  | 237802  | -      | 284      | 31980.44 | 5.59 | 66.69 | 58.41       | -0.665 |
| HbLBD15   | XP_021679463.1 | LOC110664196 | NW_018745972.1 | 220196  | 222028  | +      | 215      | 23499.76 | 5.92 | 76.79 | 72.88       | -0.172 |
| HbLBD16   | XP_021680496.1 | LOC110664918 | NW_018745996.1 | 441735  | 443529  | -      | 222      | 24010.31 | 5.6  | 78.29 | 83.3        | -0.16  |
| HbLBD17   | XP_021681468.1 | LOC110665577 | NW_018746009.1 | 1278134 | 1279380 | -      | 196      | 21374.16 | 5.35 | 71.33 | 79.23       | -0.31  |
| HbLBD18   | XP_021683712.1 | LOC110667224 | NW_018746054.1 | 1140775 | 1145721 | +      | 215      | 23665.52 | 5.21 | 78.56 | 51.21       | -0.173 |
| HbLBD19   | XP_021683852.1 | LOC110667349 | NW_018746059.1 | 825445  | 827230  | +      | 196      | 21400.3  | 5.35 | 74.23 | 77.72       | -0.25  |
| HbLBD20   | XP_021684524.1 | LOC110667867 | NW_018746072.1 | 841327  | 842521  | -      | 237      | 25776.26 | 8.61 | 77.38 | 80.93       | -0.315 |
| HbLBD21   | XP_021684825.1 | LOC110668075 | NW_018746076.1 | 384192  | 386475  | -      | 222      | 24143.53 | 9.02 | 71.22 | 76.68       | -0.37  |
| HbLBD22   | XP_021685282.1 | LOC110668385 | NW_018746081.1 | 91134   | 91882   | +      | 170      | 19111.76 | 8.21 | 74.65 | 70.07       | -0.272 |
| HbLBD23   | XP_021686927.1 | LOC110669531 | NW_018746114.1 | 116820  | 118181  | +      | 226      | 24645.44 | 5.94 | 61.81 | 40.72       | -0.371 |
| HbLBD24   | XP_021690332.1 | LOC110671988 | NW_018746183.1 | 79523   | 80360   | -      | 208      | 22808.76 | 5.84 | 72.21 | 44.32       | -0.287 |
| HbLBD25   | XP_021690526.1 | LOC110672142 | NW_018746196.1 | 15221   | 16332   | -      | 238      | 26211.05 | 6.51 | 84.79 | 45.66       | -0.306 |
| HbLBD26   | XP_021690689.1 | LOC110672267 | NW_018746203.1 | 404808  | 405669  | +      | 164      | 18434.03 | 8.78 | 73.72 | 51.01       | -0.266 |

|         |                |              |                |        |        |   |     |          |      |       |       |        |
|---------|----------------|--------------|----------------|--------|--------|---|-----|----------|------|-------|-------|--------|
| HbLBD27 | XP_021691222.1 | LOC110672686 | NW_018746220.1 | 661453 | 662594 | + | 250 | 28190.69 | 8.84 | 61.2  | 48.18 | -0.791 |
| HbLBD28 | XP_021691667.1 | LOC110673020 | NW_018746229.1 | 478353 | 479642 | + | 211 | 22890.2  | 9.22 | 79.53 | 54.32 | -0.154 |
| HbLBD29 | XP_021691713.1 | LOC110673039 | NW_018746230.1 | 197610 | 199559 | - | 167 | 18605.9  | 6.88 | 63.17 | 51.39 | -0.51  |
| HbLBD30 | XP_021635423.1 | LOC110631776 | NW_018746267.1 | 722034 | 725598 | - | 233 | 26012.7  | 6.39 | 64.08 | 64.92 | -0.817 |
| HbLBD31 | XP_021635859.1 | LOC110632061 | NW_018746273.1 | 390164 | 391543 | + | 211 | 23593.84 | 8.76 | 73.08 | 62.31 | -0.352 |
| HbLBD32 | XP_021636999.1 | LOC110632930 | NW_018746312.1 | 290693 | 294513 | + | 221 | 24312.25 | 8.25 | 68.14 | 51.63 | -0.487 |
| HbLBD33 | XP_021637557.1 | LOC110633316 | NW_018746320.1 | 32591  | 34745  | - | 252 | 28063.83 | 8.35 | 75.95 | 47.12 | -0.481 |
| HbLBD34 | XP_021637950.1 | LOC110633592 | NW_018746330.1 | 304711 | 305737 | + | 242 | 26723.28 | 6.38 | 79.01 | 50.8  | -0.408 |
| HbLBD35 | XP_021638677.1 | LOC110634087 | NW_018746347.1 | 86529  | 90367  | + | 222 | 24284.18 | 8.25 | 70.5  | 48    | -0.473 |
| HbLBD36 | XP_021639088.1 | LOC110634412 | NW_018746356.1 | 990    | 2281   | - | 239 | 26111.1  | 8.05 | 80.75 | 74.72 | -0.168 |
| HbLBD37 | XP_021639460.1 | LOC110634677 | NW_018746367.1 | 14269  | 16018  | - | 196 | 21562.5  | 6.29 | 71.79 | 71.56 | -0.317 |
| HbLBD38 | XP_021643936.1 | LOC110637874 | NW_018746503.1 | 192121 | 193513 | - | 300 | 32236.43 | 8.02 | 76.8  | 47.28 | -0.38  |
| HbLBD39 | XP_021644428.1 | LOC110638244 | NW_018746516.1 | 106353 | 107823 | + | 244 | 26665.48 | 9.04 | 73.16 | 65.86 | -0.355 |
| HbLBD40 | XP_021644716.1 | LOC110638463 | NW_018746526.1 | 35438  | 38980  | - | 148 | 16285.53 | 7.61 | 71.22 | 61.39 | -0.33  |
| HbLBD41 | XP_021646781.1 | LOC110639956 | NW_018746600.1 | 275348 | 276426 | - | 210 | 23029.23 | 8.84 | 81.33 | 59.71 | -0.177 |
| HbLBD42 | XP_021648653.1 | LOC110641299 | NW_018746669.1 | 27722  | 29700  | - | 165 | 18222.45 | 6.88 | 64.55 | 58.94 | -0.509 |
| HbLBD43 | XP_021649066.1 | LOC110641593 | NW_018746686.1 | 216815 | 217404 | + | 144 | 16267.5  | 9.32 | 71.18 | 65.84 | -0.49  |
| HbLBD44 | XP_021650016.1 | LOC110642327 | NW_018746730.1 | 39804  | 41178  | + | 315 | 35692.34 | 5.76 | 80.79 | 58.99 | -0.534 |
| HbLBD45 | XP_021650001.1 | LOC110642318 | NW_018746730.1 | 49570  | 51198  | + | 313 | 35621.2  | 5.73 | 78.82 | 61.16 | -0.577 |
| HbLBD46 | XP_021650387.1 | LOC110642595 | NW_018746749.1 | 148301 | 150605 | - | 186 | 20429.03 | 6.89 | 66.18 | 59.15 | -0.473 |
| HbLBD47 | XP_021652563.1 | LOC110644197 | NW_018746860.1 | 128665 | 129730 | + | 116 | 13029.18 | 8.6  | 90.86 | 49.05 | -0.024 |
| HbLBD48 | XP_021653516.1 | LOC110644865 | NW_018746906.1 | 27547  | 29479  | - | 211 | 23223.36 | 6.97 | 71.75 | 61.05 | -0.241 |
| HbLBD49 | XP_021654436.1 | LOC110645535 | NW_018746964.1 | 174677 | 175779 | - | 170 | 18758.38 | 6.17 | 83.76 | 57.17 | -0.163 |
| HbLBD50 | XP_021654459.1 | LOC110645560 | NW_018746965.1 | 123976 | 124716 | - | 164 | 18212.84 | 6.04 | 83.23 | 52.49 | -0.166 |
| HbLBD51 | XP_021654778.1 | LOC110645827 | NW_018746988.1 | 57766  | 59623  | - | 225 | 24536.92 | 9.16 | 72.04 | 77.61 | -0.428 |
| HbLBD52 | XP_021656006.1 | LOC110646770 | NW_018747096.1 | 97574  | 98458  | - | 218 | 24041.83 | 5.02 | 72.16 | 60.75 | -0.269 |
| HbLBD53 | XP_021657344.1 | LOC110647698 | NW_018747222.1 | 4371   | 7032   | - | 241 | 24942.33 | 8.14 | 72.9  | 76.04 | -0.111 |
| HbLBD54 | XP_021657345.1 | LOC110647699 | NW_018747222.1 | 18787  | 22893  | + | 200 | 21740.74 | 8.13 | 84.4  | 62.3  | -0.142 |
| HbLBD55 | XP_021658319.1 | LOC110648408 | NW_018747354.1 | 66413  | 68831  | + | 228 | 25184.04 | 6.14 | 61.71 | 45.45 | -0.362 |
| HbLBD56 | XP_021658599.1 | LOC110648616 | NW_018747390.1 | 57296  | 60688  | - | 309 | 34631.74 | 6.78 | 63.24 | 70.47 | -0.708 |

|         |                |              |                |          |          |   |      |          |      |       |       |        |
|---------|----------------|--------------|----------------|----------|----------|---|------|----------|------|-------|-------|--------|
| HbLBD57 | XP_021658595.1 | LOC110648612 | NW_018747390.1 | 66560    | 68353    | - | 333  | 37240.79 | 6.94 | 68.62 | 59.34 | -0.606 |
| HbLBD58 | XP_021661230.1 | LOC110650533 | NW_018747913.1 | 21824    | 22731    | - | 216  | 24180.98 | 8.76 | 51.94 | 50.83 | -0.877 |
| JcLBD1  | jc007534       | jc007534     | chr1           | 33092759 | 33093487 | - | 242  | 27679    | 5.12 | 83.8  | 54.27 | -0.594 |
| JcLBD2  | jc000568       | jc000568     | chr2           | 4131390  | 4132181  | + | 119  | 13481.67 | 9.24 | 95.21 | 61.72 | -0.079 |
| JcLBD3  | jc001994       | jc001994     | chr2           | 30086916 | 30095550 | + | 1077 | 117788.7 | 6.87 | 91.45 | 46.42 | -0.044 |
| JcLBD4  | jc008273       | jc008273     | chr3           | 2337459  | 2338644  | - | 218  | 23926.56 | 5.45 | 61.83 | 47.58 | -0.332 |
| JcLBD5  | jc009890       | jc009890     | chr3           | 29940371 | 29943213 | + | 246  | 27063.76 | 8.56 | 70.12 | 71.82 | -0.435 |
| JcLBD6  | jc010057       | jc010057     | chr3           | 31123703 | 31124584 | + | 293  | 32769.48 | 5.91 | 67.65 | 68.11 | -0.655 |
| JcLBD7  | jc010058       | jc010058     | chr3           | 31127455 | 31129932 | + | 282  | 31636.49 | 6.24 | 72.73 | 68.82 | -0.631 |
| JcLBD8  | jc010059       | jc010059     | chr3           | 31137572 | 31138486 | + | 304  | 33925.88 | 6.36 | 61.38 | 62.92 | -0.696 |
| JcLBD9  | jc010192       | jc010192     | chr3           | 31875853 | 31876899 | - | 245  | 27321.6  | 9.28 | 66.45 | 44.35 | -0.806 |
| JcLBD10 | jc024015       | jc024015     | chr4           | 26189697 | 26191598 | + | 299  | 32606    | 8.87 | 81.54 | 43.75 | -0.414 |
| JcLBD11 | jc002798       | jc002798     | chr5           | 958082   | 958963   | + | 293  | 32650.41 | 5.81 | 70.68 | 67.5  | -0.577 |
| JcLBD12 | jc003946       | jc003946     | chr5           | 22873023 | 22874462 | + | 133  | 15016.07 | 8.72 | 67.59 | 56.73 | -0.441 |
| JcLBD13 | jc004246       | jc004246     | chr5           | 24621899 | 24623215 | - | 219  | 23979.13 | 8.38 | 67.85 | 56.17 | -0.309 |
| JcLBD14 | jc005177       | jc005177     | chr5           | 29703799 | 29708286 | - | 243  | 25165.58 | 8.51 | 75.93 | 76.66 | -0.087 |
| JcLBD15 | jc005178       | jc005178     | chr5           | 29713870 | 29716968 | + | 199  | 21902.01 | 8.86 | 81.91 | 59.33 | -0.219 |
| JcLBD16 | jc015544       | jc015544     | chr6           | 7003170  | 7004478  | + | 215  | 23196.36 | 6.59 | 80.74 | 67.1  | -0.106 |
| JcLBD17 | jc016552       | jc016552     | chr6           | 28028951 | 28029975 | + | 213  | 23456.29 | 5.1  | 77.98 | 51.8  | -0.185 |
| JcLBD18 | jc016732       | jc016732     | chr6           | 29813069 | 29813936 | - | 209  | 23791.03 | 7.57 | 76.12 | 72.49 | -0.37  |
| JcLBD19 | jc016750       | jc016750     | chr6           | 29973563 | 29974466 | + | 158  | 17527.05 | 6.27 | 87.66 | 55.42 | -0.108 |
| JcLBD20 | jc016797       | jc016797     | chr6           | 30233915 | 30236221 | - | 228  | 25007.42 | 9.01 | 68.51 | 77.29 | -0.483 |
| JcLBD21 | jc013323       | jc013323     | chr8           | 4037152  | 4038926  | + | 260  | 29074.79 | 5.89 | 79.5  | 57.53 | -0.455 |
| JcLBD22 | jc014622       | jc014622     | chr8           | 28532059 | 28532715 | - | 218  | 23937.89 | 8.25 | 69.54 | 49.54 | -0.442 |
| JcLBD23 | jc017499       | jc017499     | chr9           | 3441377  | 3443171  | - | 210  | 22584.77 | 8.83 | 83.62 | 54.34 | -0.11  |
| JcLBD24 | jc018856       | jc018856     | chr9           | 26534939 | 26536693 | + | 234  | 25895.48 | 8.78 | 76.71 | 79.43 | -0.39  |
| JcLBD25 | jc018876       | jc018876     | chr9           | 26647471 | 26648772 | - | 176  | 19596.23 | 7.1  | 78.69 | 52.65 | -0.307 |
| JcLBD26 | jc010498       | jc010498     | chr10          | 616328   | 619724   | - | 134  | 14684.61 | 6.27 | 71.34 | 64.73 | -0.316 |
| JcLBD27 | jc011310       | jc011310     | chr10          | 4896873  | 4897430  | + | 185  | 20432.98 | 7.04 | 63.89 | 49.8  | -0.496 |
| JcLBD28 | jc011472       | jc011472     | chr10          | 5815531  | 5816580  | - | 306  | 34189.04 | 5.84 | 71.14 | 56.05 | -0.613 |

|         |                     |                 |              |          |          |   |     |          |      |       |       |        |
|---------|---------------------|-----------------|--------------|----------|----------|---|-----|----------|------|-------|-------|--------|
| JcLBD29 | jc011890            | jc011890        | chr10        | 8652887  | 8654313  | - | 243 | 26825.3  | 5.96 | 76.63 | 50.24 | -0.447 |
| JcLBD30 | jc012433            | jc012433        | chr10        | 22647810 | 22651132 | - | 171 | 18575.35 | 8.96 | 81.05 | 49.93 | -0.167 |
| JcLBD31 | jc021378            | jc021378        | chr11        | 1934384  | 1935851  | + | 332 | 37487.12 | 8.74 | 79.61 | 54.43 | -0.651 |
| JcLBD32 | jc022184            | jc022184        | chr11        | 7030067  | 7030594  | + | 175 | 19381.57 | 5.79 | 63.09 | 51.96 | -0.6   |
| JcLBD33 | jc022416            | jc022416        | chr11        | 9148990  | 9149775  | - | 211 | 24318.86 | 9.09 | 68.44 | 61.32 | -0.694 |
| MeLBD1  | Manes.01G110000.1.p | Manes.01G110000 | Chromosome01 | 23137090 | 23138516 | - | 297 | 32067.35 | 8.48 | 77.51 | 44.9  | -0.374 |
| MeLBD2  | Manes.01G265300.1.p | Manes.01G265300 | Chromosome01 | 33740451 | 33743054 | - | 250 | 25832.18 | 8.51 | 69.52 | 82.06 | -0.17  |
| MeLBD3  | Manes.01G265400.1.p | Manes.01G265400 | Chromosome01 | 33758823 | 33761456 | + | 198 | 21835.94 | 7.61 | 78.38 | 54.05 | -0.158 |
| MeLBD4  | Manes.02G068400.1.p | Manes.02G068400 | Chromosome02 | 5106630  | 5108019  | - | 302 | 32634.03 | 6.71 | 76.85 | 44.71 | -0.326 |
| MeLBD5  | Manes.03G048400.1.p | Manes.03G048400 | Chromosome03 | 4122624  | 4123494  | - | 261 | 29911.54 | 6.42 | 74.37 | 68.21 | -0.635 |
| MeLBD6  | Manes.04G025300.1.p | Manes.04G025300 | Chromosome04 | 2645577  | 2647259  | - | 190 | 20672.44 | 5.56 | 70.95 | 75.53 | -0.221 |
| MeLBD7  | Manes.04G140100.1.p | Manes.04G140100 | Chromosome04 | 26698259 | 26699014 | - | 251 | 28737.4  | 5.23 | 83.11 | 58.63 | -0.506 |
| MeLBD8  | Manes.05G044500.1.p | Manes.05G044500 | Chromosome05 | 3254262  | 3256710  | - | 241 | 24999.36 | 8.14 | 75.39 | 72.87 | -0.11  |
| MeLBD9  | Manes.05G044600.1.p | Manes.05G044600 | Chromosome05 | 3264974  | 3267144  | + | 201 | 22244.34 | 9    | 83.48 | 60.85 | -0.254 |
| MeLBD10 | Manes.05G087800.1.p | Manes.05G087800 | Chromosome05 | 6894800  | 6895806  | + | 254 | 28047.44 | 8.58 | 79.21 | 63.39 | -0.059 |
| MeLBD11 | Manes.05G180800.1.p | Manes.05G180800 | Chromosome05 | 24762145 | 24763119 | - | 209 | 22554.7  | 8.13 | 85.41 | 56.14 | -0.035 |
| MeLBD12 | Manes.05G188800.1.p | Manes.05G188800 | Chromosome05 | 26101305 | 26102167 | - | 166 | 18502.25 | 8.44 | 80.48 | 56.52 | -0.166 |
| MeLBD13 | Manes.06G068500.1.p | Manes.06G068500 | Chromosome06 | 18330826 | 18331652 | + | 239 | 26173.65 | 5.12 | 81.97 | 52.96 | -0.331 |
| MeLBD14 | Manes.06G097500.1.p | Manes.06G097500 | Chromosome06 | 20914462 | 20915524 | + | 294 | 32931.53 | 5.66 | 72.38 | 66.93 | -0.586 |
| MeLBD15 | Manes.06G108700.1.p | Manes.06G108700 | Chromosome06 | 21828155 | 21830418 | - | 185 | 20436.1  | 6.95 | 60.76 | 64.25 | -0.542 |
| MeLBD16 | Manes.06G173400.1.p | Manes.06G173400 | Chromosome06 | 27305151 | 27308303 | + | 146 | 16009.24 | 7.62 | 70.21 | 57.12 | -0.314 |
| MeLBD17 | Manes.07G058400.1.p | Manes.07G058400 | Chromosome07 | 6890438  | 6891502  | + | 220 | 23974.35 | 7.48 | 73.55 | 48.1  | -0.24  |
| MeLBD18 | Manes.07G102200.1.p | Manes.07G102200 | Chromosome07 | 23105287 | 23106645 | + | 216 | 23576.01 | 6.06 | 79.54 | 74.11 | -0.134 |
| MeLBD19 | Manes.07G118600.1.p | Manes.07G118600 | Chromosome07 | 24652426 | 24653392 | + | 218 | 24132.07 | 4.67 | 73.07 | 53.02 | -0.225 |
| MeLBD20 | Manes.07G132200.1.p | Manes.07G132200 | Chromosome07 | 25697536 | 25698858 | - | 171 | 18984.69 | 8.55 | 81.7  | 64.84 | -0.161 |
| MeLBD21 | Manes.07G134700.1.p | Manes.07G134700 | Chromosome07 | 25912090 | 25912774 | + | 165 | 18298.9  | 6.17 | 88.06 | 55.47 | -0.16  |
| MeLBD22 | Manes.07G138500.1.p | Manes.07G138500 | Chromosome07 | 26403736 | 26405477 | + | 214 | 23399.58 | 9.02 | 69.77 | 71.46 | -0.384 |
| MeLBD23 | Manes.08G154100.1.p | Manes.08G154100 | Chromosome08 | 31801958 | 31803707 | + | 225 | 24618.9  | 7.08 | 80.71 | 57.58 | -0.211 |
| MeLBD24 | Manes.09G032700.1.p | Manes.09G032700 | Chromosome09 | 4727734  | 4728283  | - | 116 | 13138.24 | 8.08 | 83.36 | 59.09 | -0.166 |
| MeLBD25 | Manes.09G137400.1.p | Manes.09G137400 | Chromosome09 | 25753012 | 25754109 | + | 243 | 26637.95 | 6.4  | 80.74 | 60.4  | -0.332 |



|         |                     |                 |                |          |          |   |     |          |      |       |       |        |
|---------|---------------------|-----------------|----------------|----------|----------|---|-----|----------|------|-------|-------|--------|
| MeLBD26 | Manes.10G005700.1.p | Manes.10G005700 | Chromosome10   | 441952   | 443794   | + | 228 | 24794.27 | 9.01 | 71.49 | 76.29 | -0.393 |
| MeLBD27 | Manes.10G008800.1.p | Manes.10G008800 | Chromosome10   | 680175   | 680863   | - | 170 | 18841.53 | 6.17 | 83.18 | 52.59 | -0.126 |
| MeLBD28 | Manes.10G010200.1.p | Manes.10G010200 | Chromosome10   | 794939   | 795796   | + | 171 | 19092.69 | 8.89 | 69.71 | 70.42 | -0.317 |
| MeLBD29 | Manes.10G027400.1.p | Manes.10G027400 | Chromosome10   | 2238554  | 2240468  | - | 215 | 23822.7  | 4.9  | 76.33 | 48.88 | -0.22  |
| MeLBD30 | Manes.10G042900.1.p | Manes.10G042900 | Chromosome10   | 3830274  | 3831489  | + | 216 | 23701.1  | 6.69 | 74.54 | 71.78 | -0.208 |
| MeLBD31 | Manes.11G026000.1.p | Manes.11G026000 | Chromosome11   | 2272404  | 2273147  | + | 247 | 28338.85 | 5.08 | 82.51 | 53.66 | -0.617 |
| MeLBD32 | Manes.11G140800.1.p | Manes.11G140800 | Chromosome11   | 25328208 | 25329869 | + | 194 | 21277.08 | 5.35 | 67.99 | 75.41 | -0.279 |
| MeLBD33 | Manes.12G000100.1.p | Manes.12G000100 | Chromosome12   | 20916    | 22841    | + | 221 | 24234.1  | 8.56 | 67.69 | 53.76 | -0.523 |
| MeLBD34 | Manes.12G030700.1.p | Manes.12G030700 | Chromosome12   | 2373012  | 2375258  | - | 227 | 24831.57 | 6.03 | 62.03 | 50.52 | -0.4   |
| MeLBD35 | Manes.12G091800.1.p | Manes.12G091800 | Chromosome12   | 13976847 | 13979498 | - | 257 | 28807.27 | 8.89 | 62.57 | 36.04 | -0.79  |
| MeLBD36 | Manes.12G093700.1.p | Manes.12G093700 | Chromosome12   | 14936620 | 14938922 | + | 300 | 33364.38 | 5.98 | 68.7  | 59.34 | -0.606 |
| MeLBD37 | Manes.12G093800.1.p | Manes.12G093800 | Chromosome12   | 14964472 | 14968053 | + | 302 | 33889.14 | 6.21 | 72.05 | 67.39 | -0.612 |
| MeLBD38 | Manes.12G110600.1.p | Manes.12G110600 | Chromosome12   | 25605195 | 25606435 | + | 247 | 27106.93 | 8.61 | 72.23 | 70.96 | -0.366 |
| MeLBD39 | Manes.13G031900.1.p | Manes.13G031900 | Chromosome13   | 2995261  | 2997536  | - | 230 | 25203.09 | 6.14 | 64.57 | 46.07 | -0.355 |
| MeLBD40 | Manes.13G113000.1.p | Manes.13G113000 | Chromosome13   | 23990699 | 23991927 | + | 247 | 27081.93 | 8.77 | 76.15 | 63.07 | -0.364 |
| MeLBD41 | Manes.13G128100.1.p | Manes.13G128100 | Chromosome13   | 25544935 | 25547012 | + | 299 | 33184.22 | 6.4  | 68.26 | 59.37 | -0.535 |
| MeLBD42 | Manes.13G128200.1.p | Manes.13G128200 | Chromosome13   | 25551631 | 25554253 | + | 287 | 32347.06 | 6.16 | 67.04 | 69.13 | -0.721 |
| MeLBD43 | Manes.14G012200.1.p | Manes.14G012200 | Chromosome14   | 1166656  | 1169919  | - | 148 | 16295.51 | 8.25 | 73.18 | 62.43 | -0.322 |
| MeLBD44 | Manes.14G029300.1.p | Manes.14G029300 | Chromosome14   | 2433536  | 2434013  | - | 128 | 14318.39 | 8.95 | 79.38 | 57.44 | -0.279 |
| MeLBD45 | Manes.14G062100.1.p | Manes.14G062100 | Chromosome14   | 5060059  | 5062273  | + | 185 | 20570.11 | 6.09 | 64.97 | 64.98 | -0.524 |
| MeLBD46 | Manes.14G073600.1.p | Manes.14G073600 | Chromosome14   | 5942407  | 5943402  | - | 290 | 32632.06 | 5.64 | 69.03 | 62.75 | -0.673 |
| MeLBD47 | Manes.14G102500.1.p | Manes.14G102500 | Chromosome14   | 8273112  | 8274407  | - | 242 | 26879.54 | 6.59 | 80.54 | 41.45 | -0.376 |
| MeLBD48 | Manes.15G149900.1.p | Manes.15G149900 | Chromosome15   | 11786336 | 11788445 | - | 172 | 18887.14 | 7.6  | 63.6  | 54.07 | -0.488 |
| MeLBD49 | Manes.16G057100.1.p | Manes.16G057100 | Chromosome16   | 16066664 | 16069337 | + | 174 | 19071.68 | 8.25 | 71.21 | 64.43 | -0.307 |
| MeLBD50 | Manes.16G081100.1.p | Manes.16G081100 | Chromosome16   | 23816043 | 23816684 | - | 213 | 23436.54 | 8.23 | 84.32 | 51.08 | -0.391 |
| MeLBD51 | Manes.17G051500.1.p | Manes.17G051500 | Chromosome17   | 18877608 | 18878366 | + | 252 | 28616.24 | 7.53 | 61.94 | 56.65 | -0.796 |
| MeLBD52 | Manes.17G112700.1.p | Manes.17G112700 | Chromosome17   | 25314973 | 25316856 | + | 179 | 19583.97 | 7.62 | 68.16 | 69.97 | -0.502 |
| MeLBD53 | Manes.18G045200.1.p | Manes.18G045200 | Chromosome18   | 3887324  | 3888368  | - | 210 | 22813.89 | 8.12 | 77.62 | 58.02 | -0.16  |
| MeLBD54 | Manes.S010300.1.p   | Manes.S010300   | Scaffold00460  | 295160   | 296399   | - | 244 | 26469.02 | 7.69 | 74.75 | 84.91 | -0.399 |
| RcLBD1  | XP_025015760.1      | LOC8261015      | NW_002995419.1 | 14056    | 15076    | - | 225 | 24675.26 | 5.94 | 57.78 | 46.78 | -0.43  |

|         |                |            |                |         |         |   |     |          |      |       |       |        |
|---------|----------------|------------|----------------|---------|---------|---|-----|----------|------|-------|-------|--------|
| RcLBD2  | XP_002533415.2 | LOC8280381 | NW_002995019.1 | 72098   | 73464   | - | 291 | 31918.76 | 9    | 91.89 | 40.92 | -0.142 |
| RcLBD3  | XP_015582369.1 | LOC8285784 | NW_002994800.1 | 66782   | 68354   | + | 220 | 24407.28 | 9.45 | 87.32 | 58.58 | -0.191 |
| RcLBD4  | XP_002530717.1 | LOC8267077 | NW_002994730.1 | 94459   | 95142   | + | 117 | 13033.05 | 8.83 | 86.84 | 59.15 | -0.066 |
| RcLBD5  | XP_002530212.1 | LOC8271164 | NW_002994690.1 | 46022   | 46793   | + | 171 | 19270.11 | 5.84 | 85.56 | 63.34 | -0.206 |
| RcLBD6  | XP_025014967.1 | LOC8276720 | NW_002994654.1 | 19764   | 21752   | + | 154 | 17057.45 | 8.81 | 80.52 | 78.99 | -0.449 |
| RcLBD7  | XP_002528321.1 | LOC8265382 | NW_002994593.1 | 197486  | 198431  | - | 176 | 19514.24 | 8.55 | 80.45 | 63.82 | -0.105 |
| RcLBD8  | XP_002527499.2 | LOC8272260 | NW_002994548.1 | 180593  | 182075  | - | 290 | 32238.03 | 8.64 | 80.69 | 58.62 | -0.062 |
| RcLBD9  | XP_002527399.1 | LOC8266956 | NW_002994546.1 | 47689   | 48890   | + | 245 | 28021.51 | 4.97 | 88    | 65.11 | -0.528 |
| RcLBD10 | XP_002526340.1 | LOC8285998 | NW_002994502.1 | 43823   | 45806   | + | 201 | 21871.9  | 4.86 | 77.31 | 77.3  | -0.136 |
| RcLBD11 | XP_002525698.1 | LOC8286506 | NW_002994473.1 | 203877  | 206954  | + | 240 | 26129.36 | 6.07 | 81.38 | 70.11 | -0.279 |
| RcLBD12 | XP_002525255.1 | LOC8283348 | NW_002994460.1 | 42360   | 43774   | - | 246 | 26988.67 | 8.91 | 68.17 | 69.4  | -0.451 |
| RcLBD13 | XP_002525150.1 | LOC8264235 | NW_002994458.1 | 352749  | 354823  | - | 258 | 28775.22 | 8.95 | 57.79 | 38.72 | -0.793 |
| RcLBD14 | XP_002524207.1 | LOC8274859 | NW_002994437.1 | 68898   | 69655   | + | 218 | 24370.34 | 4.53 | 75.69 | 48.28 | -0.263 |
| RcLBD15 | XP_015576883.1 | LOC8259176 | NW_002994399.1 | 126632  | 128127  | + | 280 | 31373.07 | 9.07 | 70.71 | 56.06 | -0.73  |
| RcLBD16 | XP_025013725.1 | LOC8267241 | NW_002994396.1 | 169842  | 173255  | + | 310 | 34490.75 | 6.4  | 72.16 | 65.44 | -0.63  |
| RcLBD17 | XP_002521459.1 | LOC8281783 | NW_002994381.1 | 400912  | 402828  | - | 175 | 19271.66 | 7.63 | 61.37 | 62.89 | -0.522 |
| RcLBD18 | XP_002521022.1 | LOC8274770 | NW_002994370.1 | 625165  | 626614  | + | 212 | 23248.35 | 7.53 | 73.25 | 62.51 | -0.203 |
| RcLBD19 | XP_002520780.1 | LOC8272084 | NW_002994368.1 | 57754   | 58516   | + | 173 | 19274.92 | 6.21 | 85.14 | 54.05 | -0.206 |
| RcLBD20 | XP_002520837.1 | LOC8259521 | NW_002994368.1 | 381740  | 383568  | - | 223 | 24321.76 | 9.01 | 71.79 | 73.07 | -0.374 |
| RcLBD21 | XP_002517720.1 | LOC8282744 | NW_002994324.1 | 430457  | 432104  | + | 233 | 25336.73 | 8.21 | 64.55 | 69.88 | -0.4   |
| RcLBD22 | XP_002517449.3 | LOC8276004 | NW_002994321.1 | 683342  | 683843  | - | 161 | 18110.76 | 8.88 | 76.96 | 54.6  | -0.475 |
| RcLBD23 | XP_002516432.1 | LOC8259574 | NW_002994311.1 | 48398   | 49431   | + | 191 | 21088.64 | 6.88 | 71.1  | 75.11 | -0.519 |
| RcLBD24 | XP_002514766.1 | LOC8263444 | NW_002994293.1 | 27292   | 30817   | + | 218 | 23763.77 | 8.24 | 70.46 | 47.82 | -0.369 |
| RcLBD25 | XP_002513395.1 | LOC8272614 | NW_002994285.1 | 600899  | 605086  | - | 147 | 16099.32 | 7.61 | 69.73 | 60.35 | -0.282 |
| RcLBD26 | XP_002511729.1 | LOC8270647 | NW_002994279.1 | 854816  | 858313  | - | 203 | 22322.4  | 8.72 | 78.33 | 58.94 | -0.242 |
| RcLBD27 | XP_002511730.1 | LOC8270648 | NW_002994279.1 | 866075  | 869447  | + | 247 | 25434.91 | 8.4  | 76.28 | 71.53 | -0.052 |
| RcLBD28 | XP_002511341.1 | LOC8278307 | NW_002994278.1 | 3151751 | 3153575 | + | 188 | 20110.76 | 6.29 | 61.86 | 62.82 | -0.397 |
| RcLBD29 | XP_002511502.1 | LOC8258162 | NW_002994278.1 | 4227330 | 4228516 | - | 284 | 32024.58 | 5.79 | 66.34 | 68.4  | -0.638 |
| RcLBD30 | XP_002510109.1 | LOC8288504 | NW_002994277.1 | 836487  | 837918  | + | 212 | 23301.7  | 8.62 | 80.94 | 49.71 | -0.14  |

**Table S2.** Prediction of microRNA target sites for *LBD* genes in Euphorbiaceae

| miRNA_Acc.   | Target_Acc. | Expectation | miRNA_start | miRNA_end | Target_start | Target_end | miRNA_aligned_fragment     | alignment           | Target_aligned_fragment    | Inhibition  | Multiplicity |
|--------------|-------------|-------------|-------------|-----------|--------------|------------|----------------------------|---------------------|----------------------------|-------------|--------------|
| Hbr-miR164e  | HbLBD21     | 4           | 1           | 21        | 1271         | 1291       | UGGAGAAGCAGGGCAC<br>AUGCU  | : : : : :<br>:      | GAUAUGUUUCUUUCUU<br>CUCCA  | Cleavage    | 1            |
| Hbr-miR172a  | HbLBD16     | 4           | 1           | 21        | 448          | 468        | AGAAUCUUGAUGAUGC<br>UGCAU  | : : : : : : :<br>:  | CAGCAACAUCAUCAAG<br>UUCCU  | Cleavage    | 1            |
| Hbr-miR172a  | HbLBD19     | 4           | 1           | 21        | 296          | 315        | AGAAUCUUGAUGAUGC<br>UGCAU  | : : : : : : :<br>:  | UAGCAACAUCAUCAAG-<br>UUCU  | Cleavage    | 1            |
| Hbr-miR172b  | HbLBD16     | 4           | 1           | 21        | 448          | 467        | GGAAUCUUGAUGAUGC<br>UGCAG  | : : : : : : :<br>:: | CAGCAACAUCAUCAAG-<br>UUCC  | Cleavage    | 1            |
| Hbr-miR172c  | HbLBD16     | 4           | 1           | 21        | 448          | 467        | GGAAUCUUGAUGAUGC<br>UGCAG  | : : : : : : :<br>:: | CAGCAACAUCAUCAAG-<br>UUCC  | Cleavage    | 1            |
| Hbr-miR172d  | HbLBD16     | 4           | 1           | 21        | 448          | 468        | AGAAUCUUGAUGAUGC<br>UGCAU  | : : : : : : :<br>:  | CAGCAACAUCAUCAAG<br>UUCCU  | Cleavage    | 1            |
| Hbr-miR172d  | HbLBD19     | 4           | 1           | 21        | 296          | 315        | AGAAUCUUGAUGAUGC<br>UGCAU  | : : : : ~ : :<br>:  | UAGCAACAUCAUCAAG-<br>UUCU  | Cleavage    | 1            |
| Hbr-miR172e  | HbLBD16     | 4           | 1           | 21        | 448          | 468        | AGAAUCUUGAUGAUGC<br>UGCAU  | : : : : ~ : :<br>:  | CAGCAACAUCAUCAAG<br>UUCCU  | Cleavage    | 1            |
| Hbr-miR172e  | HbLBD19     | 4           | 1           | 21        | 296          | 315        | AGAAUCUUGAUGAUGC<br>UGCAU  | : : : : ~ : :<br>:  | UAGCAACAUCAUCAAG-<br>UUCU  | Cleavage    | 1            |
| Hbr-miR2118  | HbLBD16     | 4           | 1           | 21        | 1015         | 1035       | GAAAUUGGUGGAUGGG<br>AGUGA  | : : : : : : :<br>:  | CUACUUGUAUUCAUUC<br>AUUUU  | Cleavage    | 1            |
| Hbr-miR9386a | HbLBD32     | 4           | 1           | 22        | 345          | 366        | UUUGCAGUUCGAAAGU<br>GGAAGC | : : : : : : :<br>.  | CUCUCGACUUUCCAGU<br>UGCAAG | Translation | 1            |
| Hbr-miR9386b | HbLBD32     | 4           | 1           | 22        | 345          | 366        | UUUGCAGUUCGAAAGU<br>GGAAGC | : : : : ~ : :<br>.  | CUCUCGACUUUCCAGU<br>UGCAAG | Translation | 1            |
| Hbr-miRN1507 | HbLBD40     | 4           | 1           | 21        | 755          | 775        | AAUGGGUAGGUGGGUA<br>AGAUG  | : : : : : : :<br>:: | CUUUUUGCCUACAUAAC<br>UUAUU | Cleavage    | 1            |
| Hbr-miRN1509 | HbLBD18     | 4           | 1           | 21        | 3560         | 3580       | CAGUUGAUGCAUUGUA<br>UGAUU  | : : : : ~ : :<br>:  | CAUCUUACAAUGCAUG<br>AACAG  | Cleavage    | 1            |

|              |         |     |   |    |      |      |                                                                                                                    |             |   |
|--------------|---------|-----|---|----|------|------|--------------------------------------------------------------------------------------------------------------------|-------------|---|
| Hbr-miRN1513 | HbLBD18 | 4   | 1 | 21 | 4459 | 4479 | UGUUGGAAGUCUUUGA : : : : : : : : : : : : : : : : CACUUUGAAAGAUUUU<br>AGGGG : : : : : : : : : : : : : : : : GAACA   | Cleavage    | 1 |
| Hbr-miRN1519 | HbLBD21 | 4   | 1 | 21 | 628  | 648  | UUGGCAGCAAGGACUU : : : : : : : : : : : : : : : : UCACAAAGUUUUUGGU<br>UGGGU : : : : : : : : : : : : : : : : GCCAG   | Cleavage    | 1 |
| Hbr-miR156a  | HbLBD32 | 4.5 | 1 | 21 | 1598 | 1618 | UGACAGAAGAGAGAGA : : : : : : : : : : : : : : : : AUUUUUUUUUUUUUUUUU<br>GCACA : : : : : : : : : : : : : : : : UGUUU | Cleavage    | 1 |
| Hbr-miR156a  | HbLBD15 | 4.5 | 1 | 21 | 28   | 48   | UGACAGAAGAGAGAGA : : : : : : : : : : : : : : : : CCUCUUCUCUUUCUUC<br>GCACA : : : : : : : : : : : : : : : : UCUCU   | Cleavage    | 1 |
| Hbr-miR159b  | HbLBD25 | 4.5 | 1 | 21 | 354  | 374  | AUCUGCCGACUCAUUC : : : : : : : : : : : : : : : : CCAGUGUAUGGGUCGG<br>AUUCA : : : : : : : : : : : : : : : : UGGGG   | Cleavage    | 1 |
| Hbr-miR159c  | HbLBD11 | 4.5 | 1 | 20 | 524  | 543  | AUUGGAGUGAAGGGAG : : : : : : : : : : : : : : : : GGAACUCCGAUCACUC<br>CUCU : : : : : : : : : : : : : : : : CGAU     | Translation | 1 |
| Hbr-miR159d  | HbLBD11 | 4.5 | 1 | 20 | 524  | 543  | AUUGGAGUGAAGGGAG : : : : : : : : : : : : : : : : GGAACUCCGAUCACUC<br>CUCU : : : : : : : : : : : : : : : : CGAU     | Translation | 1 |
| Hbr-miR159e  | HbLBD11 | 4.5 | 1 | 21 | 523  | 543  | AUUGGAGUGAAGGGAG : : : : : : : : : : : : : : : : AGGAACUCCGAUCACU<br>CUCGG : : : : : : : : : : : : : : : : CCGAU   | Translation | 1 |
| Hbr-miR164a  | HbLBD21 | 4.5 | 1 | 21 | 1271 | 1291 | UGGAGAAGCAGGGCAC : : : : : : : : : : : : : : : : GAUAUGUUUCUUUCUU<br>GUGCA : : : : : : : : : : : : : : : : CUCCA   | Cleavage    | 1 |
| Hbr-miR164b  | HbLBD21 | 4.5 | 1 | 21 | 1271 | 1291 | UGGAGAAGCAGGGCAC : : : : : : : : : : : : : : : : GAUAUGUUUCUUUCUU<br>GUGCA : : : : : : : : : : : : : : : : CUCCA   | Cleavage    | 1 |
| Hbr-miR164c  | HbLBD21 | 4.5 | 1 | 21 | 1271 | 1291 | UGGAGAAGCAGGGCAC : : : : : : : : : : : : : : : : GAUAUGUUUCUUUCUU<br>GUGCA : : : : : : : : : : : : : : : : CUCCA   | Cleavage    | 1 |
| Hbr-miR164d  | HbLBD21 | 4.5 | 1 | 21 | 1271 | 1291 | UGGAGAAGCAGGGCAC : : : : : : : : : : : : : : : : GAUAUGUUUCUUUCUU<br>GUGCA : : : : : : : : : : : : : : : : CUCCA   | Cleavage    | 1 |
| Hbr-miR164e  | HbLBD39 | 4.5 | 1 | 21 | 254  | 273  | UGGAGAAGCAGGGCAC : : : : : : : : : : : : : : : : CUCUUGU-<br>AUGCU : : : : : : : : : : : : : : : : CUUUGCUUCUCCG   | Cleavage    | 1 |
| Hbr-miR164f  | HbLBD21 | 4.5 | 1 | 21 | 1271 | 1291 | UGGAGAAGCAGGGCAC : : : : : : : : : : : : : : : : GAUAUGUUUCUUUCUU<br>GUGCA : : : : : : : : : : : : : : : : CUCCA   | Cleavage    | 1 |
| Hbr-miR164g  | HbLBD21 | 4.5 | 1 | 21 | 1271 | 1291 | UGGAGAAGCAGGGCAC : : : : : : : : : : : : : : : : GAUAUGUUUCUUUCUU<br>GUGCA : : : : : : : : : : : : : : : : CUCCA   | Cleavage    | 1 |
| Hbr-miR164h  | HbLBD21 | 4.5 | 1 | 21 | 1271 | 1291 | UGGAGAAGCAGGGCAC : : : : : : : : : : : : : : : : GAUAUGUUUCUUUCUU<br>GUGCA : : : : : : : : : : : : : : : : CUCCA   | Cleavage    | 1 |
| Hbr-miR172a  | HbLBD15 | 4.5 | 1 | 21 | 353  | 372  | AGAAUCUUGAUGAUGC : : : : : : : : : : : : : : : : CAGUAACAUCAUCAAG-<br>UGCAU : : : : : : : : : : : : : : : : UUCU   | Cleavage    | 1 |

|             |         |     |   |    |      |      |                                                                  |          |   |
|-------------|---------|-----|---|----|------|------|------------------------------------------------------------------|----------|---|
| Hbr-miR172a | HbLBD17 | 4.5 | 1 | 21 | 281  | 300  | AGAAUCUUGAUGAUGC :: ::::: :: UAGCAACAUCAUUAAG-<br>UGCAU : UUCU   | Cleavage | 1 |
| Hbr-miR172b | HbLBD19 | 4.5 | 1 | 21 | 296  | 315  | GGAAUCUUGAUGAUGC :: ::::: :: UAGCAACAUCAUCAAG-<br>UGCAG . UUCU   | Cleavage | 1 |
| Hbr-miR172c | HbLBD19 | 4.5 | 1 | 21 | 296  | 315  | GGAAUCUUGAUGAUGC :: ::::: :: UAGCAACAUCAUCAAG-<br>UGCAG . UUCU   | Cleavage | 1 |
| Hbr-miR172d | HbLBD15 | 4.5 | 1 | 21 | 353  | 372  | AGAAUCUUGAUGAUGC :: ::::: :: CAGUAACAUCAUCAAG-<br>UGCAU : UUCU   | Cleavage | 1 |
| Hbr-miR172d | HbLBD17 | 4.5 | 1 | 21 | 281  | 300  | AGAAUCUUGAUGAUGC :: ::::: :: UAGCAACAUCAUUAAG-<br>UGCAU : UUCU   | Cleavage | 1 |
| Hbr-miR172e | HbLBD15 | 4.5 | 1 | 21 | 353  | 372  | AGAAUCUUGAUGAUGC :: ::::: :: CAGUAACAUCAUCAAG-<br>UGCAU : UUCU   | Cleavage | 1 |
| Hbr-miR172e | HbLBD17 | 4.5 | 1 | 21 | 281  | 300  | AGAAUCUUGAUGAUGC :: ::::: :: UAGCAACAUCAUUAAG-<br>UGCAU : UUCU   | Cleavage | 1 |
| Hbr-miR395e | HbLBD42 | 4.5 | 1 | 21 | 941  | 961  | CUGAAGGGUUUGGAGG :: :::: :::: CAGUACUUUUAACCCC<br>AACUC :: UUUAG | Cleavage | 1 |
| Hbr-miR395f | HbLBD42 | 4.5 | 1 | 21 | 941  | 961  | CUGAAGGGUUUGGAGG :: :::: :::: CAGUACUUUUAACCCC<br>AACUC :: UUUAG | Cleavage | 1 |
| Hbr-miR396a | HbLBD38 | 4.5 | 1 | 21 | 620  | 640  | UUCCACAGCUUUCUUG :: :::: :::: AGGGUUAGGAGAGCUG<br>AACUU . UGAAG  | Cleavage | 1 |
| Hbr-miR396b | HbLBD38 | 4.5 | 1 | 21 | 620  | 640  | UUCCACAGCUUUCUUG :: :::: :::: AGGGUUAGGAGAGCUG<br>AACUG . UGAAG  | Cleavage | 1 |
| Hbr-miR396c | HbLBD38 | 4.5 | 1 | 21 | 620  | 640  | UUCCACAGCUUUCUUG :: :::: :::: AGGGUUAGGAGAGCUG<br>AACUU . UGAAG  | Cleavage | 1 |
| Hbr-miR396d | HbLBD38 | 4.5 | 1 | 21 | 620  | 640  | UUCCACAGCUUUCUUG :: :::: :::: AGGGUUAGGAGAGCUG<br>AACUG . UGAAG  | Cleavage | 1 |
| Hbr-miR396e | HbLBD38 | 4.5 | 1 | 21 | 620  | 640  | UUCCACAGCUUUCUUG :: :::: :::: AGGGUUAGGAGAGCUG<br>AACUU . UGAAG  | Cleavage | 1 |
| Hbr-miR397a | HbLBD35 | 4.5 | 1 | 21 | 403  | 423  | UCAUUGAGUGCAGCGU ::: ::::: :: UCUCGACUUUGCACUA<br>UGAUG : GGUGA  | Cleavage | 1 |
| Hbr-miR397b | HbLBD35 | 4.5 | 1 | 21 | 403  | 423  | UCAUUGAGUGCAGCGU ::: ::::: :: UCUCGACUUUGCACUA<br>UGAUG : GGUGA  | Cleavage | 1 |
| Hbr-miR399d | HbLBD56 | 4.5 | 1 | 20 | 1570 | 1589 | UGCCAAAGGAGAAUUG :: :::: :::: UGAGAAGUUCUUCUUU<br>CCCU : UGCA    | Cleavage | 1 |

| miRNA        | Host Gene | miRNA Length | Seed Match | miRNA Position | Host Gene Position | miRNA Sequence              | Host Gene Sequence         | Interaction Type | Score |
|--------------|-----------|--------------|------------|----------------|--------------------|-----------------------------|----------------------------|------------------|-------|
| Hbr-miR399e  | HbLBD56   | 4.5          | 1          | 20             | 1570-1589          | UGCCAAAGGAGAAUUG<br>CCCUCUU | UGAGAAGUUCUUCUUU<br>UGCA   | Cleavage         | 1     |
| Hbr-miR6171  | HbLBD43   | 4.5          | 1          | 21             | 376-396            | AUGUGGAUUGCUGAAG<br>GCUUU   | GCCGUCCUCAGCAAUU<br>CUCAU  | Cleavage         | 1     |
| Hbr-miRN1497 | HbLBD6    | 4.5          | 1          | 21             | 512-532            | UAUGGUGUGUUACUUU<br>UGAGU   | CUUCCAAUGUAAUGCC<br>CCAUA  | Cleavage         | 1     |
| Hbr-miRN1500 | HbLBD4    | 4.5          | 1          | 21             | 1627-1647          | UGAAGAUAAAGAGUCUG<br>UUUGA  | CGAAAAGGAUUUUUAU<br>UUUGA  | Cleavage         | 1     |
| Hbr-miRN1513 | HbLBD53   | 4.5          | 1          | 20             | 1-20               | UGUUGGAAGUCUUUGA<br>AGGG    | GGCUUUAAGACUUUC<br>AUCU    | Cleavage         | 1     |
| Hbr-miRN1518 | HbLBD24   | 4.5          | 1          | 22             | 597-618            | CGCAAGUUGUUUCUUG<br>GCUAUG  | AGCGGACGAGAAGCAG<br>CUGGCG | Cleavage         | 1     |
| Hbr-miRN1519 | HbLBD26   | 4.5          | 1          | 21             | 145-165            | UUGGCAGCAAGGACUU<br>UGGGU   | UCACAAGGUCUUUGGU<br>GCUAG  | Cleavage         | 1     |
| Hbr-miRN1519 | HbLBD3    | 4.5          | 1          | 21             | 363-383            | UUGGCAGCAAGGACUU<br>UGGGU   | CCACAAGGUCUUUGGU<br>GCUAG  | Cleavage         | 1     |
| Hbr-miRN1519 | HbLBD16   | 4.5          | 1          | 21             | 430-450            | UUGGCAGCAAGGACUU<br>UGGGU   | UCAUAGAGUCUUUGGU<br>GCCAG  | Cleavage         | 1     |
| Hbr-miRN1519 | HbLBD51   | 4.5          | 1          | 21             | 680-700            | UUGGCAGCAAGGACUU<br>UGGGU   | UCACAAAGUUUUUGGU<br>GCUAG  | Cleavage         | 1     |
| Hbr-miRN1519 | HbLBD38   | 4.5          | 1          | 21             | 271-291            | UUGGCAGCAAGGACUU<br>UGGGU   | CGCCACUGUCUUUCUU<br>GCCAA  | Cleavage         | 1     |
| Hbr-miRN1519 | HbLBD13   | 4.5          | 1          | 21             | 227-247            | UUGGCAGCAAGGACUU<br>UGGGU   | CGCCACCUCUUUGUC<br>GCCAA   | Cleavage         | 1     |
| Jcu-miR172b  | JcLBD4    | 4            | 1          | 21             | 643-663            | AGAAUCUUGAUGAUGC<br>UGCAU   | CAAUGGAGUUAUCAAG<br>AUUCU  | Cleavage         | 1     |
| Jcu-miR172c  | JcLBD4    | 4            | 1          | 21             | 643-663            | AGAAUCUUGAUGAUGC<br>UGCAU   | CAAUGGAGUUAUCAAG<br>AUUCU  | Cleavage         | 1     |
| Jcu-miR172d  | JcLBD4    | 4            | 1          | 21             | 643-663            | AGAAUCUUGAUGAUGC<br>UGCAU   | CAAUGGAGUUAUCAAG<br>AUUCU  | Cleavage         | 1     |
| Jcu-miRN1624 | JcLBD16   | 4            | 1          | 20             | 1169-1188          | UCCAAUAAAUUCAACU<br>CGUA    | CUCGAUUUGAGAUUAU<br>UGGA   | Cleavage         | 1     |
| Jcu-miR156a  | JcLBD20   | 4.5          | 1          | 21             | 277-297            | UUGACAGAAGAGAGAG<br>AGCAC   | GUCUUUUCUUUCUUCU<br>AUUAA  | Cleavage         | 3     |

|             |         |     |   |    |      |      |                                                                       |             |   |
|-------------|---------|-----|---|----|------|------|-----------------------------------------------------------------------|-------------|---|
| Jcu-miR159  | JcLBD5  | 4.5 | 1 | 21 | 534  | 554  | UUUGGAUUGAAGGGAG : : : : : CAGAGCACCAAUCAAU<br>CUCUA : : : : : UCAAA  | Translation | 1 |
| Jcu-miR164a | JcLBD3  | 4.5 | 1 | 21 | 1827 | 1847 | UGGAGAAGCAGGGCAC : : : : : UCCAUAUGCCUUUUUU<br>GUGCA : : : : : CUCUA  | Cleavage    | 1 |
| Jcu-miR164a | JcLBD14 | 4.5 | 1 | 21 | 1414 | 1434 | UGGAGAAGCAGGGCAC : : : : : CUCAGAUCUUUUGCUU<br>GUGCA : : : : : CUUCA  | Cleavage    | 1 |
| Jcu-miR164b | JcLBD3  | 4.5 | 1 | 21 | 1827 | 1847 | UGGAGAAGCAGGGCAC : : : : : UCCAUAUGCCUUUUUU<br>GUGCA : : : : : CUCUA  | Cleavage    | 1 |
| Jcu-miR164b | JcLBD14 | 4.5 | 1 | 21 | 1414 | 1434 | UGGAGAAGCAGGGCAC : : : : : CUCAGAUCUUUUGCUU<br>GUGCA : : : : : CUUCA  | Cleavage    | 1 |
| Jcu-miR164c | JcLBD3  | 4.5 | 1 | 21 | 1827 | 1847 | UGGAGAAGCAGGGCAC : : : : : UCCAUAUGCCUUUUUU<br>GUGCA : : : : : CUCUA  | Cleavage    | 1 |
| Jcu-miR164c | JcLBD14 | 4.5 | 1 | 21 | 1414 | 1434 | UGGAGAAGCAGGGCAC : : : : : CUCAGAUCUUUUGCUU<br>GUGCA : : : : : CUUCA  | Cleavage    | 1 |
| Jcu-miR172a | JcLBD4  | 4.5 | 1 | 21 | 643  | 663  | GGAAUCUUGAUGAUGC : : : : : CAAUGGAGUUAUCAAG<br>UGCAG : : : : : AUUCU  | Cleavage    | 1 |
| Jcu-miR172b | JcLBD1  | 4.5 | 1 | 21 | 547  | 567  | AGAAUCUUGAUGAUGC : : : : : GGUAUUCAUCAUCAAG<br>UGCAU : : : : : GUUCU  | Cleavage    | 1 |
| Jcu-miR172b | JcLBD22 | 4.5 | 1 | 21 | 2    | 21   | AGAAUCUUGAUGAUGC : : : : : UGGCAUCGUCAUCAAA-<br>UGCAU : : : : : AUUCU | Cleavage    | 1 |
| Jcu-miR172c | JcLBD1  | 4.5 | 1 | 21 | 547  | 567  | AGAAUCUUGAUGAUGC : : : : : GGUAUUCAUCAUCAAG<br>UGCAU : : : : : GUUCU  | Cleavage    | 1 |
| Jcu-miR172c | JcLBD22 | 4.5 | 1 | 21 | 2    | 21   | AGAAUCUUGAUGAUGC : : : : : UGGCAUCGUCAUCAAA-<br>UGCAU : : : : : AUUCU | Cleavage    | 1 |
| Jcu-miR172d | JcLBD1  | 4.5 | 1 | 21 | 547  | 567  | AGAAUCUUGAUGAUGC : : : : : GGUAUUCAUCAUCAAG<br>UGCAU : : : : : GUUCU  | Cleavage    | 1 |
| Jcu-miR172d | JcLBD22 | 4.5 | 1 | 21 | 2    | 21   | AGAAUCUUGAUGAUGC : : : : : UGGCAUCGUCAUCAAA-<br>UGCAU : : : : : AUUCU | Cleavage    | 1 |
| Jcu-miR395a | JcLBD15 | 4.5 | 1 | 21 | 418  | 438  | CUGAAGAGUUUGGAGG : : : : : CGGUGCCUGCAAUUC<br>AACUC : : : : : UUGAG   | Cleavage    | 1 |
| Mes-miR172a | MeLBD6  | 3   | 1 | 21 | 269  | 289  | AGAAUCUUGAUGAUGC : : : : : AAGCAACAUCAUUAAG<br>UGCAU : : : : : UUUCU  | Cleavage    | 1 |
| Mes-miR172b | MeLBD6  | 3   | 1 | 21 | 269  | 289  | AGAAUCUUGAUGAUGC : : : : : AAGCAACAUCAUUAAG<br>UGCAU : : : : : UUUCU  | Cleavage    | 1 |

|              |         |     |   |    |     |     |                                                                  |             |   |
|--------------|---------|-----|---|----|-----|-----|------------------------------------------------------------------|-------------|---|
| Mes-miR172c  | MeLBD6  | 3   | 1 | 21 | 269 | 289 | AGAAUCUUGAUGAUGC : :: ::::: : AAGCAACAUCAUUAAG<br>UGCAU :: UUUCU | Cleavage    | 1 |
| Mes-miR171h  | MeLBD51 | 3.5 | 1 | 21 | 121 | 141 | UUGAGCCGCGUCAAUA : :::: GCAGAUCUUGAAGCGG<br>UCUCC :: CUCAU       | Translation | 1 |
| Mes-miR171k  | MeLBD51 | 3.5 | 1 | 21 | 121 | 141 | UUGAGCCGCGUCAAUA :::: GCAGAUCUUGAAGCGG<br>UCUCU :: CUCAU         | Translation | 1 |
| Mes-miR172d  | MeLBD6  | 3.5 | 1 | 21 | 269 | 289 | GGAAUCUUGAUGAUGC :: ::::: : AAGCAACAUCAUUAAG<br>UGCAG . UUUCU    | Cleavage    | 1 |
| Mes-miR172e  | MeLBD6  | 3.5 | 1 | 21 | 269 | 289 | GGAAUCUUGAUGAUGC :: ::::: : AAGCAACAUCAUUAAG<br>UGCAG . UUUCU    | Cleavage    | 1 |
| Mes-miR1446a | MeLBD37 | 4   | 1 | 22 | 119 | 140 | UGAACUCUCUCCCUCA :: :::: GGUCGCCGAGGGAGAG<br>UAGGCU :::: AGUUUG  | Cleavage    | 1 |
| Mes-miR156b  | MeLBD40 | 4   | 1 | 21 | 58  | 78  | UUGACAGAAGAGAGAG ::::: : CUGCUCUUUCUUUUUU<br>AGCAC .: UUUAG      | Cleavage    | 1 |
| Mes-miR172a  | MeLBD30 | 4   | 1 | 21 | 296 | 315 | AGAAUCUUGAUGAUGC :: ::::: : CAGCAACAUCAUCAAG-<br>UGCAU : UUCU    | Cleavage    | 1 |
| Mes-miR172b  | MeLBD30 | 4   | 1 | 21 | 296 | 315 | AGAAUCUUGAUGAUGC :: ::::: : CAGCAACAUCAUCAAG-<br>UGCAU : UUCU    | Cleavage    | 1 |
| Mes-miR172c  | MeLBD30 | 4   | 1 | 21 | 296 | 315 | AGAAUCUUGAUGAUGC :: ::::: : CAGCAACAUCAUCAAG-<br>UGCAU : UUCU    | Cleavage    | 1 |
| Mes-miRN1870 | MeLBD26 | 4   | 1 | 21 | 91  | 111 | UGGGUUGUAGAAAGGG : ::::: CCUCUCUCUUUCUGCA<br>GUAAU : ACUCC       | Cleavage    | 1 |
| Mes-miRN1860 | MeLBD15 | 4   | 1 | 22 | 19  | 41  | UAG-<br>GGAUGGAGAAUGAAUG ::::: CUCCAUCCUUCUCCA<br>GUA :: UCCACUA | Cleavage    | 1 |
| Mes-miR1446a | MeLBD2  | 4.5 | 1 | 22 | 85  | 106 | UGAACUCUCUCCCUCA ::::: GCUAAAUGGGGGAGGG<br>UAGGCU :::: GGUUUG    | Cleavage    | 1 |
| Mes-miR1446b | MeLBD37 | 4.5 | 1 | 22 | 119 | 140 | UGAACUCUCCCCCUCA :::: GCUCGCCGAGGGAGAG<br>ACGGCU :::: AGUUUG     | Translation | 1 |
| Mes-miR1446c | MeLBD37 | 4.5 | 1 | 22 | 119 | 140 | UGAACUCUCCCCCUCA :::: GCUCGCCGAGGGAGAG<br>ACGGCU :::: AGUUUG     | Translation | 1 |
| Mes-miR156b  | MeLBD3  | 4.5 | 1 | 21 | 814 | 834 | UUGACAGAAGAGAGAG : ::::: UUUUUUUUUUUUUUCU<br>AGCAC .: GUUGA      | Cleavage    | 1 |



|             |         |     |   |    |     |     |                                                                  |          |   |
|-------------|---------|-----|---|----|-----|-----|------------------------------------------------------------------|----------|---|
| Mes-miR156c | MeLBD40 | 4.5 | 1 | 20 | 58  | 77  | UGACAGAAGAGAGUGA : : : : : : : CUGCUCUUUCUUUUUU<br>GCAC : UUUA   | Cleavage | 1 |
| Mes-miR156d | MeLBD40 | 4.5 | 1 | 20 | 58  | 77  | UGACAGAAGAGAGUGA : : : : : : : CUGCUCUUUCUUUUUU<br>GCAC : UUUA   | Cleavage | 1 |
| Mes-miR156e | MeLBD40 | 4.5 | 1 | 20 | 58  | 77  | UGACAGAAGAGAGUGA : : : : : : : CUGCUCUUUCUUUUUU<br>GCAC : UUUA   | Cleavage | 1 |
| Mes-miR156f | MeLBD40 | 4.5 | 1 | 20 | 58  | 77  | UGACAGAAGAGAGUGA : : : : : : : CUGCUCUUUCUUUUUU<br>GCAC : UUUA   | Cleavage | 1 |
| Mes-miR156g | MeLBD40 | 4.5 | 1 | 20 | 58  | 77  | UGACAGAAGAGAGUGA : : : : : : : CUGCUCUUUCUUUUUU<br>GCAC : UUUA   | Cleavage | 1 |
| Mes-miR156h | MeLBD40 | 4.5 | 1 | 20 | 58  | 77  | UGACAGAAGAGAGUGA : : : : : : : CUGCUCUUUCUUUUUU<br>GCAC : UUUA   | Cleavage | 1 |
| Mes-miR156i | MeLBD40 | 4.5 | 1 | 20 | 58  | 77  | UGACAGAAGAGAGUGA : : : : : : : CUGCUCUUUCUUUUUU<br>GCAC : UUUA   | Cleavage | 1 |
| Mes-miR157a | MeLBD42 | 4.5 | 1 | 21 | 549 | 569 | UGAUAGAAGAUAGCGA : : : : : : : UUUGCACCCUAUUUUC<br>GCACA : CAUCG | Cleavage | 1 |
| Mes-miR172a | MeLBD18 | 4.5 | 1 | 21 | 382 | 401 | AGAAUCUUGAUGAUGC : : : : : : : CAGUAACAUCAUCAAG-<br>UGCAU : UUCU | Cleavage | 1 |
| Mes-miR172b | MeLBD18 | 4.5 | 1 | 21 | 382 | 401 | AGAAUCUUGAUGAUGC : : : : : : : CAGUAACAUCAUCAAG-<br>UGCAU : UUCU | Cleavage | 1 |
| Mes-miR172c | MeLBD18 | 4.5 | 1 | 21 | 382 | 401 | AGAAUCUUGAUGAUGC : : : : : : : CAGUAACAUCAUCAAG-<br>UGCAU : UUCU | Cleavage | 1 |
| Mes-miR172d | MeLBD30 | 4.5 | 1 | 21 | 296 | 315 | GGAAUCUUGAUGAUGC : : : : : : : CAGCAACAUCAUCAAG-<br>UGCAG : UUCU | Cleavage | 1 |
| Mes-miR172d | MeLBD34 | 4.5 | 1 | 21 | 680 | 700 | GGAAUCUUGAUGAUGC : : : : : : : CGAUGGACUUAUCAAG<br>UGCAG : AUUCC | Cleavage | 1 |
| Mes-miR172e | MeLBD30 | 4.5 | 1 | 21 | 296 | 315 | GGAAUCUUGAUGAUGC : : : : : : : CAGCAACAUCAUCAAG-<br>UGCAG : UUCU | Cleavage | 1 |
| Mes-miR172e | MeLBD34 | 4.5 | 1 | 21 | 680 | 700 | GGAAUCUUGAUGAUGC : : : : : : : CGAUGGACUUAUCAAG<br>UGCAG : AUUCC | Cleavage | 1 |
| Mes-miR394a | MeLBD20 | 4.5 | 1 | 20 | 84  | 103 | UUGGCAUUCUGUCCAC : : : : : : : UAAGGUGGAUAGAAAG<br>CUCC : CGAA   | Cleavage | 1 |
| Mes-miR394b | MeLBD20 | 4.5 | 1 | 20 | 84  | 103 | UUGGCAUUCUGUCCAC : : : : : : : UAAGGUGGAUAGAAAG<br>CUCC : CGAA   | Cleavage | 1 |

|               |         |     |   |    |      |      |                                 |                   |                             |          |   |
|---------------|---------|-----|---|----|------|------|---------------------------------|-------------------|-----------------------------|----------|---|
| Mes-miR394c   | MeLBD20 | 4.5 | 1 | 20 | 84   | 103  | UUGGCAUUCUGUCCAC<br>CUCC        | ..... : :<br>CGAA | UAAGGUGGAUAGAAAG            | Cleavage | 1 |
| Mes-miR396a   | MeLBD4  | 4.5 | 1 | 21 | 610  | 630  | UUCCACAGCUUUCUUG<br>AACUU       | : : .....<br>:    | CGGGUCAGGAGAGUUG<br>UGAAG   | Cleavage | 1 |
| Mes-miR396b   | MeLBD4  | 4.5 | 1 | 21 | 610  | 630  | UUCCACAGCUUUCUUG<br>AACUG       | : : .....<br>:    | CGGGUCAGGAGAGUUG<br>UGAAG   | Cleavage | 1 |
| Mes-miR396c   | MeLBD4  | 4.5 | 1 | 21 | 610  | 630  | UUCCACAGCUUUCUUG<br>AACUU       | : : .....<br>:    | CGGGUCAGGAGAGUUG<br>UGAAG   | Cleavage | 1 |
| Mes-miR396d   | MeLBD4  | 4.5 | 1 | 21 | 610  | 630  | UUCCACAGCUUUCUUG<br>AACUU       | : : .....<br>:    | CGGGUCAGGAGAGUUG<br>UGAAG   | Cleavage | 1 |
| Mes-miR396e   | MeLBD4  | 4.5 | 1 | 21 | 610  | 630  | UUCCACAGCUUUCUUG<br>AACUG       | : : .....<br>:    | CGGGUCAGGAGAGUUG<br>UGAAG   | Cleavage | 1 |
| Mes-miR396f   | MeLBD4  | 4.5 | 1 | 21 | 610  | 630  | UUCCACAGCUUUCUUG<br>AACUU       | : : .....<br>:    | CGGGUCAGGAGAGUUG<br>UGAAG   | Cleavage | 1 |
| Mes-miR535c   | MeLBD17 | 4.5 | 1 | 21 | 66   | 86   | UUGACGACGAGAGAGA<br>GCACG       | : : ..... :<br>:: | CUUUCUUUUUCUUGUU<br>AUCAA   | Cleavage | 1 |
| Mes-miR535d   | MeLBD17 | 4.5 | 1 | 21 | 66   | 86   | UUGACGACGAGAGAGA<br>GCACA       | : : ..... :<br>:  | CUUUCUUUUUCUUGUU<br>AUCAA   | Cleavage | 1 |
| Mes-miRN1836  | MeLBD12 | 4.5 | 1 | 21 | 413  | 433  | UAUGGGGGGAUUGGGC<br>AAAAU       | ..... :<br>::     | CGUUUCCCCAAUCCCAC<br>UGUU   | Cleavage | 1 |
| Mes-miRN1837a | MeLBD29 | 4.5 | 1 | 21 | 852  | 872  | UGAAGUGAGUAGAUUU<br>GGUUA       | ..... :<br>::     | GAUACAGAACUAUUCA<br>CUUCA   | Cleavage | 1 |
| Mes-miRN1837b | MeLBD29 | 4.5 | 1 | 21 | 852  | 872  | UGAAGUGAGUAGAUUU<br>GGUUA       | ..... :<br>::     | GAUACAGAACUAUUCA<br>CUUCA   | Cleavage | 1 |
| Mes-miRN1837c | MeLBD29 | 4.5 | 1 | 21 | 852  | 872  | UGAAGUGAGUAGAUUU<br>GGUUA       | ..... :<br>::     | GAUACAGAACUAUUCA<br>CUUCA   | Cleavage | 1 |
| Mes-miRN1860  | MeLBD45 | 4.5 | 1 | 22 | 23   | 45   | UAG-<br>GGAUGGAGAAUGAAUG<br>GUA | ..... :<br>::     | CUCCAUUUCUUCUCCA<br>UCCACUA | Cleavage | 1 |
| Mes-miRN1866a | MeLBD36 | 4.5 | 1 | 22 | 1603 | 1624 | CAGGUUGUAGAUAAACG<br>UAGGCA     | ..... :<br>::     | GCUCUGCAUUUUUUUAC<br>AGCUUG | Cleavage | 1 |
| Mes-miRN1866b | MeLBD36 | 4.5 | 1 | 22 | 1603 | 1624 | CAGGUUGUAGAUAAACG<br>UAGGCA     | ..... :<br>::     | GCUCUGCAUUUUUUUAC<br>AGCUUG | Cleavage | 1 |

|               |         |     |   |    |      |      |                                                                 |             |   |
|---------------|---------|-----|---|----|------|------|-----------------------------------------------------------------|-------------|---|
| Mes-miRN1866c | MeLBD36 | 4.5 | 1 | 22 | 1603 | 1624 | CAGGUUGUAGAUAAACG : : : : : GCUCUGCAUUUUUUAC<br>UAGGCA : AGCUUG | Cleavage    | 1 |
| Mes-miRN1866d | MeLBD36 | 4.5 | 1 | 22 | 1603 | 1624 | CAGGUUGUAGAUAAACG : : : : : GCUCUGCAUUUUUUAC<br>UAGGCA : AGCUUG | Cleavage    | 1 |
| Mes-miRN1866e | MeLBD36 | 4.5 | 1 | 22 | 1603 | 1624 | CAGGUUGUAGAUAAACG : : : : : GCUCUGCAUUUUUUAC<br>UAGGCA : AGCUUG | Cleavage    | 1 |
| Mes-miRN1866g | MeLBD36 | 4.5 | 1 | 22 | 1603 | 1624 | CAGGUUGUAGAUAAACG : : : : : GCUCUGCAUUUUUUAC<br>UAGGCA : AGCUUG | Cleavage    | 1 |
| Mes-miRN1866h | MeLBD36 | 4.5 | 1 | 22 | 1603 | 1624 | CAGGUUGUAGAUAAACG : : : : : GCUCUGCAUUUUUUAC<br>UAGGCA : AGCUUG | Cleavage    | 1 |
| Mes-miRN1875  | MeLBD20 | 4.5 | 1 | 22 | 463  | 484  | AAGUAGAAUUUGCCAU : : : : : CGAUAUACUGCAAAUU<br>AGACGU : CUUCUU  | Cleavage    | 1 |
| Mes-miRN1878  | MeLBD36 | 4.5 | 1 | 22 | 1418 | 1439 | CAAGGAUUAUAGGUUUA : : : : : GAAGCAUAGGCCUAUC<br>UGCAUA : UUGUUG | Cleavage    | 1 |
| Rco-miR156e   | RcLBD7  | 4   | 1 | 20 | 583  | 602  | UGACAGAAGAGAGAGA : : : : : CUGUUCUCCCCUUUCU<br>GCAC : GUCA      | Translation | 2 |
| Rco-miR164d   | RcLBD20 | 4   | 1 | 21 | 1296 | 1316 | UGGAGAAGCAGGGCAC : : : : : GAUAUGUUUCUUUCUU<br>AUGCU : CUCCA    | Cleavage    | 1 |
| Rco-miR156e   | RcLBD7  | 4.5 | 1 | 20 | 393  | 412  | UGACAGAAGAGAGAGA : : : : : UUCUUCUUUUUCUUCU<br>GCAC : GCUA      | Cleavage    | 2 |
| Rco-miR156e   | RcLBD20 | 4.5 | 1 | 20 | 259  | 278  | UGACAGAAGAGAGAGA : : : : : AUUCUUUCUUUCUUUU<br>GCAC : AUUA      | Cleavage    | 2 |
| Rco-miR157a   | RcLBD11 | 4.5 | 1 | 21 | 1581 | 1601 | UUGACAGAAGAUAGAG : : : : : UGAAUUUCUGUUUUCU<br>AGCAC : GUUGA    | Cleavage    | 1 |
| Rco-miR157b   | RcLBD11 | 4.5 | 1 | 21 | 1581 | 1601 | UUGACAGAAGAUAGAG : : : : : UGAAUUUCUGUUUUCU<br>AGCAC : GUUGA    | Cleavage    | 1 |
| Rco-miR157c   | RcLBD11 | 4.5 | 1 | 21 | 1581 | 1601 | UUGACAGAAGAUAGAG : : : : : UGAAUUUCUGUUUUCU<br>AGCAC : GUUGA    | Cleavage    | 1 |
| Rco-miR164a   | RcLBD20 | 4.5 | 1 | 21 | 1296 | 1316 | UGGAGAAGCAGGGCAC : : : : : GAUAUGUUUCUUUCUU<br>GUGCA : CUCCA    | Cleavage    | 1 |
| Rco-miR164b   | RcLBD20 | 4.5 | 1 | 21 | 1296 | 1316 | UGGAGAAGCAGGGCAC : : : : : GAUAUGUUUCUUUCUU<br>GUGCA : CUCCA    | Cleavage    | 1 |
| Rco-miR164c   | RcLBD20 | 4.5 | 1 | 21 | 1296 | 1316 | UGGAGAAGCAGGGCAC : : : : : GAUAUGUUUCUUUCUU<br>GUGCA : CUCCA    | Cleavage    | 1 |

|              |         |     |   |    |     |     |                                                                  |             |   |
|--------------|---------|-----|---|----|-----|-----|------------------------------------------------------------------|-------------|---|
| Rco-miR172b  | RcLBD24 | 4.5 | 1 | 21 | 226 | 245 | AGAAUCUUGAUGAUGC :: ::::: :: UGGCGUCAUCAUCAA-<br>UGCAU : AUUCU   | Cleavage    | 1 |
| Rco-miR172c  | RcLBD24 | 4.5 | 1 | 21 | 226 | 245 | AGAAUCUUGAUGAUGC :: ::::: :: UGGCGUCAUCAUCAA-<br>UGCAU : AUUCU   | Cleavage    | 1 |
| Rco-miR172d  | RcLBD24 | 4.5 | 1 | 21 | 226 | 245 | AGAAUCUUGAUGAUGC :: ::::: :: UGGCGUCAUCAUCAA-<br>UGCAU : AUUCU   | Cleavage    | 1 |
| Rco-miR393   | RcLBD9  | 4.5 | 1 | 21 | 568 | 588 | UCCAAAGGGAUCGCAU ::::: :: AGUUA AUGCCGACUCU<br>UGAUC :: UUGGA    | Translation | 1 |
| Rco-miRN2947 | RcLBD1  | 4.5 | 1 | 21 | 287 | 307 | UAUGGGAGGCAUGGUC :: ::::: :: UUA AUGGCUGUGUCUC<br>AGAAA :: CCACA | Cleavage    | 1 |

**Table S3.** Duplication analysis of *LBD* genes in Euphorbiaceae

| Species                   | Gene Type                  | Genes                                                                                                                                                                                                                                                                                                                        |
|---------------------------|----------------------------|------------------------------------------------------------------------------------------------------------------------------------------------------------------------------------------------------------------------------------------------------------------------------------------------------------------------------|
| <i>Jatropha curcas</i>    | Singleton gene             | None                                                                                                                                                                                                                                                                                                                         |
|                           | Dispersed duplication gene | JcLBD26,JcLBD30,JcLBD2,JcLBD3,JcLBD4,JcLBD11,JcLBD12,JcLBD13,JcLBD17,<br>JcLBD18,JcLBD19,JcLBD22,JcLBD25                                                                                                                                                                                                                     |
|                           | Proximal duplication gene  | None                                                                                                                                                                                                                                                                                                                         |
|                           | Tandem duplication gene    | JcLBD6,JcLBD7,JcLBD8,JcLBD14,JcLBD15                                                                                                                                                                                                                                                                                         |
|                           | Segmental duplication gene | JcLBD1,JcLBD27,JcLBD28,JcLBD29,JcLBD31,JcLBD32,JcLBD33,JcLBD5,JcLBD9,<br>JcLBD10,JcLBD16,JcLBD20,JcLBD21,JcLBD23,JcLBD24                                                                                                                                                                                                     |
| <i>Hevea brasiliensis</i> | Singleton gene             | None                                                                                                                                                                                                                                                                                                                         |
|                           | Dispersed duplication gene | HbLBD13,HbLBD15,HbLBD16,HbLBD17,HbLBD18,HbLBD19,HbLBD20,HbLBD22,<br>HbLBD3,HbLBD23,HbLBD24,HbLBD25,HbLBD26,HbLBD27,HbLBD28,HbLBD29,<br>HbLBD30,HbLBD31,HbLBD32,HbLBD33,HbLBD34,HbLBD35,HbLBD36,HbLBD37,<br>HbLBD39,HbLBD41,HbLBD42,HbLBD5,HbLBD43,HbLBD46,HbLBD47,HbLBD48,<br>HbLBD49,HbLBD50,HbLBD52,HbLBD55,HbLBD58,HbLBD8 |
|                           | Proximal duplication gene  | HbLBD44,HbLBD45                                                                                                                                                                                                                                                                                                              |
|                           | Tandem duplication gene    | HbLBD54,HbLBD6,HbLBD7,HbLBD56,HbLBD57,HbLBD10                                                                                                                                                                                                                                                                                |
|                           | Segmental duplication gene | HbLBD1,HbLBD2,HbLBD14,HbLBD21,HbLBD4,HbLBD38,HbLBD40,HbLBD51,<br>HbLBD53,HbLBD9,HbLBD11,HbLBD12                                                                                                                                                                                                                              |
| <i>Manihot esculenta</i>  | Singleton gene             | None                                                                                                                                                                                                                                                                                                                         |
|                           | Dispersed duplication gene | MeLBD33,MeLBD44,MeLBD49,MeLBD54,MeLBD10,MeLBD12,MeLBD17,MeLBD24                                                                                                                                                                                                                                                              |
|                           | Proximal duplication gene  | None                                                                                                                                                                                                                                                                                                                         |
|                           | Tandem duplication gene    | MeLBD3,MeLBD37,MeLBD42,MeLBD9                                                                                                                                                                                                                                                                                                |
|                           | Segmental duplication gene | MeLBD1,MeLBD2,MeLBD26,MeLBD27,MeLBD28,MeLBD29,MeLBD30,MeLBD31,<br>MeLBD32,MeLBD34,MeLBD35,MeLBD36,MeLBD38,MeLBD39,MeLBD40,MeLBD41,                                                                                                                                                                                           |

|                         |                            |                                                                                                                                                                                                                        |
|-------------------------|----------------------------|------------------------------------------------------------------------------------------------------------------------------------------------------------------------------------------------------------------------|
|                         |                            | MeLBD43,MeLBD45,MeLBD46,MeLBD47,MeLBD48,MeLBD50,MeLBD51,MeLBD52,<br>MeLBD53,MeLBD4,MeLBD5,MeLBD6,MeLBD7,MeLBD8,MeLBD11,MeLBD13,<br>MeLBD14,MeLBD15,MeLBD16,MeLBD18,MeLBD19,MeLBD20,MeLBD21,MeLBD22,<br>MeLBD23,MeLBD25 |
|                         | Singleton gene             | None                                                                                                                                                                                                                   |
|                         | Dispersed duplication gene | RcLBD1,RcLBD10,RcLBD11,RcLBD14,RcLBD16,RcLBD17,RcLBD18,RcLBD19,<br>RcLBD20,RcLBD2,RcLBD21,RcLBD24,RcLBD25,RcLBD28,RcLBD3,RcLBD4,RcLBD5,<br>RcLBD6,RcLBD7,RcLBD9                                                        |
| <i>Ricinus communis</i> | Proximal duplication gene  | RcLBD26,RcLBD27                                                                                                                                                                                                        |
|                         | Tandem duplication gene    | RcLBD23                                                                                                                                                                                                                |
|                         | Segmental duplication gene | RcLBD12,RcLBD13,RcLBD15,RcLBD22,RcLBD29,RcLBD30,RcLBD8                                                                                                                                                                 |

**Table S4.** Analysis of selection pressure on *LBD* duplication gene pairs in Euphorbiaceae

| Duplicated Gene Pairs | Duplication Type      | Ka       | Ks       | Ka/Ks    | P-Value (Fisher) |
|-----------------------|-----------------------|----------|----------|----------|------------------|
| HbLBD53-HbLBD54       | Tandem duplication    | 0.279579 | 2.94822  | 0.09483  | 0                |
| HbLBD56-HbLBD57       | Tandem duplication    | 0.164051 | 0.84081  | 0.195111 | 2.13421e-39      |
| HbLBD9-HbLBD10        | Tandem duplication    | 0.335085 | 2.95259  | 0.113489 | 0                |
| HbLBD14-HbLBD4        | Segmental duplication | 0.079526 | 0.59612  | 0.133405 | 1.60313e-28      |
| HbLBD1-HbLBD2         | Segmental duplication | 0.002334 | 0.009725 | 0.240031 | 0.142303         |
| HbLBD21-HbLBD51       | Segmental duplication | 0.041734 | 0.256986 | 0.162397 | 4.2452e-12       |
| HbLBD38-HbLBD11       | Segmental duplication | 0.06326  | 0.303998 | 0.208093 | 4.40616e-16      |
| HbLBD40-HbLBD12       | Segmental duplication | 0.021696 | 0.173796 | 0.124836 | 7.08127e-07      |
| HbLBD53-HbLBD9        | Segmental duplication | 0.332146 | 2.76695  | 0.120041 | 0                |
| JcLBD14-JcLBD15       | Tandem duplication    | 0.328406 | 3.11877  | 0.1053   | 0                |
| JcLBD6-JcLBD7         | Tandem duplication    | 0.073491 | 0.327119 | 0.224662 | 4.04604e-14      |
| JcLBD7-JcLBD8         | Tandem duplication    | 0.204599 | 1.35522  | 0.15097  | 3.75782e-63      |
| JcLBD16-JcLBD23       | Segmental duplication | 0.484164 | 2.38805  | 0.202745 | 0                |
| JcLBD1-JcLBD21        | Segmental duplication | 0.52553  | 2.98619  | 0.175987 | 0                |
| JcLBD20-JcLBD24       | Segmental duplication | 0.160243 | 1.21961  | 0.131389 | 2.973e-52        |
| JcLBD27-JcLBD32       | Segmental duplication | 0.208852 | 3.12213  | 0.066894 | 0                |
| JcLBD28-JcLBD33       | Segmental duplication | 0.451834 | 3.27046  | 0.138156 | 0                |
| JcLBD29-JcLBD10       | Segmental duplication | 0.28411  | 3.54093  | 0.080236 | 0                |
| JcLBD31-JcLBD9        | Segmental duplication | 0.650161 | 2.60271  | 0.249801 | 0                |
| JcLBD5-JcLBD16        | Segmental duplication | 0.351508 | 2.66302  | 0.131996 | 0                |
| JcLBD5-JcLBD23        | Segmental duplication | 0.290298 | 2.84607  | 0.102    | 0                |
| MeLBD2-MeLBD3         | Tandem duplication    | 0.350882 | 2.693    | 0.130294 | 0                |
| MeLBD36-MeLBD37       | Tandem duplication    | 0.185011 | 0.917502 | 0.201647 | 2.14285e-42      |

|                 |                       |          |          |          |             |
|-----------------|-----------------------|----------|----------|----------|-------------|
| MeLBD41-MeLBD42 | Tandem duplication    | 0.186264 | 1.0994   | 0.169424 | 2.23217e-50 |
| MeLBD8-MeLBD9   | Tandem duplication    | 0.334432 | 2.74392  | 0.121881 | 0           |
| MeLBD1-MeLBD13  | Segmental duplication | 0.347697 | 3.13173  | 0.111024 | 0           |
| MeLBD1-MeLBD47  | Segmental duplication | 0.339879 | 3.23424  | 0.105088 | 0           |
| MeLBD1-MeLBD4   | Segmental duplication | 0.061464 | 0.389418 | 0.157834 | 1.5847e-23  |
| MeLBD23-MeLBD25 | Segmental duplication | 0.06301  | 0.473301 | 0.133128 | 3.91304e-23 |
| MeLBD26-MeLBD22 | Segmental duplication | 0.02981  | 0.403271 | 0.073921 | 1.54937e-23 |
| MeLBD27-MeLBD21 | Segmental duplication | 0.037453 | 0.578759 | 0.064712 | 2.28038e-25 |
| MeLBD28-MeLBD20 | Segmental duplication | 0.069934 | 0.489103 | 0.142985 | 7.6212e-18  |
| MeLBD29-MeLBD19 | Segmental duplication | 0.103573 | 0.266152 | 0.389151 | 1.20651e-05 |
| MeLBD2-MeLBD8   | Segmental duplication | 0.055743 | 0.361954 | 0.154006 | 5.3287e-19  |
| MeLBD30-MeLBD18 | Segmental duplication | 0.059983 | 0.36857  | 0.162746 | 1.66621e-15 |
| MeLBD30-MeLBD32 | Segmental duplication | 0.204969 | 3.68756  | 0.055584 | 0           |
| MeLBD30-MeLBD6  | Segmental duplication | 0.216842 | 3.4184   | 0.063434 | 0           |
| MeLBD31-MeLBD50 | Segmental duplication | 0.602035 | 2.66191  | 0.226167 | 0           |
| MeLBD31-MeLBD5  | Segmental duplication | 0.648078 | 2.429    | 0.266808 | 0           |
| MeLBD31-MeLBD7  | Segmental duplication | 0.060979 | 0.507059 | 0.12026  | 6.24088e-24 |
| MeLBD32-MeLBD6  | Segmental duplication | 0.041121 | 0.460541 | 0.089289 | 1.61878e-22 |
| MeLBD34-MeLBD39 | Segmental duplication | 0.05259  | 0.397186 | 0.132407 | 2.6043e-18  |
| MeLBD35-MeLBD51 | Segmental duplication | 0.755237 | 1.98502  | 0.380469 | 0           |
| MeLBD36-MeLBD41 | Segmental duplication | 0.069385 | 0.422675 | 0.164157 | 2.02315e-24 |
| MeLBD38-MeLBD11 | Segmental duplication | 0.3228   | 2.86693  | 0.112594 | 0           |
| MeLBD38-MeLBD40 | Segmental duplication | 0.08014  | 0.451071 | 0.177666 | 1.52531e-22 |
| MeLBD40-MeLBD11 | Segmental duplication | 0.31644  | 2.861    | 0.110605 | 0           |
| MeLBD40-MeLBD53 | Segmental duplication | 0.294439 | 2.78404  | 0.10576  | 0           |
| MeLBD43-MeLBD16 | Segmental duplication | 0.031749 | 0.359071 | 0.08842  | 3.5517e-14  |



|                 |                       |          |          |          |             |
|-----------------|-----------------------|----------|----------|----------|-------------|
| MeLBD45-MeLBD15 | Segmental duplication | 0.039973 | 0.216213 | 0.184878 | 1.46859e-08 |
| MeLBD46-MeLBD14 | Segmental duplication | 0.060277 | 0.739059 | 0.081559 | 1.91237e-46 |
| MeLBD47-MeLBD13 | Segmental duplication | 0.073219 | 0.402579 | 0.181876 | 1.15235e-18 |
| MeLBD47-MeLBD4  | Segmental duplication | 0.306145 | 3.35408  | 0.091275 | 0           |
| MeLBD4-MeLBD13  | Segmental duplication | 0.284267 | 3.2709   | 0.086908 | 0           |
| MeLBD50-MeLBD5  | Segmental duplication | 0.308693 | 0.800934 | 0.385416 | 1.35691e-13 |
| MeLBD50-MeLBD7  | Segmental duplication | 0.546632 | 2.77144  | 0.197237 | 0           |
| MeLBD53-MeLBD11 | Segmental duplication | 0.083221 | 0.474362 | 0.175438 | 1.27406e-19 |
| MeLBD5-MeLBD7   | Segmental duplication | 0.63584  | 2.45352  | 0.259154 | 0           |
| MeLBD6-MeLBD18  | Segmental duplication | 0.169242 | 3.65774  | 0.046269 | 0           |
| RcLBD12-RcLBD30 | Segmental duplication | 0.338409 | 2.994    | 0.113029 | 0           |
| RcLBD13-RcLBD15 | Segmental duplication | 0.692902 | 2.37799  | 0.291381 | 0           |
| RcLBD22-RcLBD29 | Segmental duplication | 0.499424 | 3.05805  | 0.163314 | 0           |
| RcLBD30-RcLBD8  | Segmental duplication | 0.458206 | 2.56099  | 0.178917 | 0           |

---

**Table S5.** Tissue expression of *JcLBD* genes

| <b>Name</b> | <b>Fruit</b> | <b>Male Flower</b> | <b>Female Flower</b> | <b>Leaf</b> | <b>Root</b> | <b>Stem</b> |
|-------------|--------------|--------------------|----------------------|-------------|-------------|-------------|
| JcLBD6      | 0.29225      | 3.86276            | 0.164039             | 0           | 0           | 0           |
| JcLBD11     | 0            | 5.66631            | 0                    | 0           | 0.079879    | 0           |
| JcLBD7      | 1.72631      | 5.24471            | 0.378196             | 0           | 2.84791     | 0           |
| JcLBD8      | 18.2269      | 15.6993            | 3.30854              | 8.83294     | 6.98812     | 0           |
| JcLBD22     | 0            | 0.352506           | 7.69418              | 4.91956     | 2.23093     | 1.59043     |
| JcLBD32     | 0.089777     | 4.316              | 19.0324              | 0           | 5.88014     | 4.96452     |
| JcLBD27     | 0.174972     | 2.71576            | 33.3546              | 0.326853    | 6.51011     | 1.16865     |
| JcLBD18     | 6.34127      | 9.85397            | 44.9917              | 3.84218     | 2.03638     | 68.6991     |
| JcLBD4      | 0            | 0                  | 0                    | 0           | 4.14449     | 0           |
| JcLBD17     | 0            | 0.258832           | 0                    | 0           | 1.72765     | 0           |
| JcLBD13     | 0.205338     | 0.070895           | 0.030409             | 0           | 2.80826     | 0.214844    |
| JcLBD15     | 0.13586      | 6.68585            | 25.2767              | 0.579699    | 4.34791     | 0.250489    |
| JcLBD3      | 11.1025      | 9.36227            | 8.2325               | 33.6791     | 8.0526      | 4.8812      |
| JcLBD14     | 15.8558      | 1.16658            | 2.87907              | 0.225872    | 2.04193     | 1.13789     |
| JcLBD24     | 0.064276     | 0.098973           | 0                    | 0           | 43.5276     | 0.628414    |
| JcLBD20     | 7.3212       | 1.87752            | 0.11304              | 0.904383    | 11.2486     | 4.17        |
| JcLBD19     | 0            | 1.67893            | 6.06907              | 0           | 12.1686     | 0           |
| JcLBD25     | 0            | 0                  | 0.049509             | 0           | 0.292256    | 0           |
| JcLBD30     | 0.202495     | 2.79672            | 3.18425              | 0.292029    | 10.4211     | 1.96696     |
| JcLBD26     | 0.9837       | 0                  | 0.676357             | 0           | 21.5433     | 6.66681     |
| JcLBD2      | 13.8558      | 0.190728           | 3.85147              | 1.00013     | 2.40928     | 0.601426    |
| JcLBD12     | 0.839434     | 0.138324           | 0.246159             | 0.337614    | 0           | 0           |
| JcLBD9      | 0            | 0                  | 0.394471             | 0           | 0           | 0           |
| JcLBD31     | 0            | 0                  | 0                    | 0           | 0           | 0           |
| JcLBD28     | 0.668832     | 3.60872            | 1.04656              | 0.972837    | 2.34478     | 0.799104    |
| JcLBD33     | 0            | 0                  | 0                    | 0           | 0           | 0           |
| JcLBD21     | 0.071081     | 36.1793            | 0                    | 0           | 0           | 0           |
| JcLBD1      | 0            | 37.7278            | 0                    | 0           | 0           | 0           |
| JcLBD10     | 6.68135      | 27.7906            | 29.7518              | 0.053569    | 27.4384     | 2.91876     |
| JcLBD29     | 24.9641      | 0.075063           | 0.070782             | 0           | 0.984168    | 0           |
| JcLBD16     | 1.13017      | 2.77142            | 9.10345              | 17.5085     | 20.4708     | 13.8738     |
| JcLBD23     | 1.20867      | 15.1682            | 5.00961              | 2.28675     | 8.07656     | 19.016      |
| JcLBD5      | 52.3571      | 35.4776            | 91.1157              | 28.9893     | 98.6094     | 200.725     |

\* Expression values were TPM values and normalized by quantile normalization.

**Table S6.** Expression of *JcLBD* genes in drought treatment

| Name    | C1dL     | C4dL    | C7dL    | D1dL    | D4dL    | D7dL     | C1dR    | C4dR     | C7dR     | D1dR    | D4dR    | D7dR     |
|---------|----------|---------|---------|---------|---------|----------|---------|----------|----------|---------|---------|----------|
| JcLBD17 | 0        | 0.8958  | 0.7161  | 0       | 0.5413  | 0        | 0       | 4.2884   | 0.7979   | 3.2661  | 1.0758  | 0.2618   |
| JcLBD25 | 0        | 15.973  | 11.7492 | 0       | 9.816   | 0        | 0       | 112.4841 | 0        | 91.2312 | 0       | 0        |
| JcLBD27 | 0        | 0       | 0       | 0       | 0       | 1.3855   | 0.2027  | 0.3717   | 0.4856   | 2.3329  | 0.9145  | 1.3858   |
| JcLBD19 | 0        | 0       | 1.2435  | 0       | 0       | 42.2908  | 0.402   | 5.911    | 0.8415   | 2.9548  | 0       | 42.3007  |
| JcLBD3  | 2.8894   | 2.2024  | 1.3143  | 3.1613  | 2.7438  | 4.3043   | 3.5986  | 1.9142   | 1.8244   | 1.0283  | 2.7519  | 2.7471   |
| JcLBD14 | 1.9378   | 3.6739  | 3.3624  | 4.4083  | 1.3612  | 1.0627   | 2.0709  | 1.3965   | 1.6683   | 1.2139  | 2.0123  | 1.6823   |
| JcLBD5  | 447.1215 | 243.546 | 273.549 | 350.49  | 60.9477 | 119.3244 | 208.538 | 74.4735  | 227.0475 | 95.0095 | 39.9278 | 131.8013 |
| JcLBD7  | 0.2565   | 0.0232  | 0       | 0.0958  | 0       | 0.0973   | 0       | 0.0352   | 0.2241   | 0.0341  | 2.4522  | 0.0194   |
| JcLBD18 | 57.7141  | 29.899  | 13.3465 | 21.2514 | 7.4393  | 4.9539   | 26.2628 | 41.7866  | 34.2189  | 28.6894 | 43.8267 | 7.648    |
| JcLBD28 | 0.3763   | 0       | 0.8573  | 0       | 0       | 0.2651   | 0.8315  | 0.0375   | 0.5423   | 0.024   | 0.277   | 0.5258   |
| JcLBD24 | 0.6275   | 0       | 0       | 0       | 0.2433  | 6.8932   | 20.9744 | 1.5789   | 23.9671  | 5.4197  | 1.1637  | 7.3656   |
| JcLBD23 | 0.4034   | 0.2391  | 3.3447  | 1.0799  | 1.3955  | 4.2993   | 2.7387  | 2.3932   | 8.0456   | 2.1     | 1.0652  | 6.0785   |
| JcLBD16 | 1.8946   | 0.7689  | 1.2404  | 0.292   | 0.6425  | 0.4009   | 1.8957  | 2.5517   | 7.9713   | 3.3439  | 3.1271  | 1.7808   |
| JcLBD20 | 2.2467   | 1.9502  | 2.3359  | 2.2739  | 3.8347  | 7.7859   | 34.1733 | 17.2097  | 32.0594  | 13.4818 | 28.5998 | 39.6101  |
| JcLBD26 | 0        | 0.8344  | 0.1877  | 1.0146  | 0.118   | 11.7249  | 65.5748 | 286.507  | 120.5565 | 220.934 | 197.681 | 66.8701  |
| JcLBD32 | 0        | 0       | 0       | 0       | 0       | 0.2826   | 7.9016  | 5.3752   | 8.4551   | 6.4456  | 36.6279 | 3.4909   |
| JcLBD30 | 0        | 0       | 0       | 0       | 0       | 0.3195   | 3.0752  | 2.7997   | 1.8696   | 3.6639  | 6.2775  | 2.2052   |
| JcLBD8  | 0        | 0.4489  | 0       | 0.4394  | 0       | 0.2668   | 1.116   | 0.6801   | 0.584    | 0       | 0.2788  | 0.5293   |
| JcLBD13 | 0.1261   | 0.0982  | 0.0276  | 0.0519  | 0.0266  | 3.6897   | 6.4057  | 4.2327   | 0.39     | 1.9857  | 0.4285  | 5.5048   |
| JcLBD10 | 0.3068   | 0.1942  | 0.4783  | 1.4596  | 0.3255  | 37.1506  | 129.813 | 35.3881  | 10.3751  | 8.0369  | 3.3957  | 40.0158  |
| JcLBD4  | 0        | 0       | 0.7681  | 0       | 0       | 0.475    | 1.0609  | 9.2373   | 1.7951   | 1.7671  | 1.9573  | 2.3435   |
| JcLBD15 | 1.8233   | 2.5462  | 0.2549  | 0.6243  | 0.4387  | 1.2822   | 2.9005  | 5.3298   | 2.66     | 2.7912  | 2.6674  | 4.4833   |

\* Expression values were TPM values and normalized by quantile normalization.

**Table S7.** Expression of *JcLBD* genes in salt treatment

| Name    | C2hL    | C2dL     | C7dL     | S2hL    | S2dL     | S7dL     | C2hR     | C2dR    | C7dR     | S2hR    | S2dR     | S7dR    |
|---------|---------|----------|----------|---------|----------|----------|----------|---------|----------|---------|----------|---------|
| JcLBD14 | 2.6065  | 1.9191   | 3.2615   | 3.1972  | 3.7349   | 2.3419   | 1.1126   | 1.1502  | 1.5546   | 1.4495  | 1.6717   | 2.1946  |
| JcLBD5  | 397.268 | 504.7825 | 266.9745 | 249.888 | 560.1935 | 215.6055 | 67.1044  | 77.1787 | 221.5705 | 66.1082 | 127.2545 | 148.949 |
| JcLBD18 | 58.7367 | 41.6491  | 13.0281  | 55.6568 | 30.6625  | 20.7038  | 23.3961  | 34.6226 | 33.3885  | 20.4175 | 20.5228  | 21.359  |
| JcLBD3  | 2.7195  | 1.5237   | 1.2926   | 4.4523  | 3.7539   | 2.4303   | 2.1624   | 1.9492  | 1.7799   | 2.5025  | 1.7551   | 2.8502  |
| JcLBD25 | 2.168   | 15.5785  | 11.4697  | 0       | 0        | 0        | 11.7807  | 28.4072 | 0        | 22.0894 | 0.8855   | 0       |
| JcLBD19 | 0       | 0        | 1.2133   | 0       | 0        | 0        | 29.5429  | 1.0636  | 0.8213   | 1.4777  | 1.481    | 0       |
| JcLBD29 | 0       | 0        | 0        | 0.0282  | 0        | 0        | 6.2857   | 0.3373  | 0.1697   | 0.6736  | 0.3522   | 1.5424  |
| JcLBD28 | 0       | 0.4489   | 0.8365   | 0       | 0        | 0        | 0.2452   | 0       | 0.5291   | 0.7217  | 1.7726   | 0.2629  |
| JcLBD23 | 0.1729  | 0.7219   | 3.2652   | 0.1784  | 0.661    | 0.364    | 2.7916   | 1.376   | 7.8505   | 0.4665  | 1.5038   | 4.8543  |
| JcLBD24 | 0       | 0        | 0        | 0       | 0.1484   | 0        | 3.5206   | 2.3613  | 23.3161  | 4.5652  | 48.2463  | 3.0524  |
| JcLBD8  | 0       | 0        | 0        | 0       | 0.3588   | 0        | 0.2629   | 0.2461  | 0.5699   | 0.5128  | 1.2847   | 1.5875  |
| JcLBD16 | 0.6454  | 0.7552   | 1.2372   | 1.2381  | 3.7216   | 0        | 1.1368   | 6.8292  | 7.7767   | 2.3432  | 7.1989   | 6.972   |
| JcLBD12 | 0.3724  | 0.0636   | 0.1233   | 0.1179  | 0        | 0.0481   | 0.0434   | 0.1553  | 0.2379   | 0.2423  | 0.1878   | 0.1921  |
| JcLBD27 | 0       | 0        | 0        | 0       | 0        | 1.1207   | 0.4312   | 1.175   | 0.4736   | 1.6816  | 2.8316   | 0.859   |
| JcLBD13 | 0       | 0.1305   | 0.0269   | 0       | 0.2757   | 0        | 5.6023   | 8.1741  | 0.4023   | 6.5     | 17.5775  | 5.3386  |
| JcLBD10 | 1.003   | 0.677    | 0.3142   | 1.9505  | 1.4234   | 0.075    | 171.9707 | 39.5508 | 10.2299  | 81.3914 | 345.5519 | 27.8747 |
| JcLBD4  | 0.0259  | 0        | 0.7494   | 0       | 0        | 0        | 2.7081   | 3.2216  | 1.7733   | 1.927   | 1.9752   | 4.8283  |
| JcLBD30 | 0       | 0        | 0        | 0       | 0        | 0        | 2.3649   | 3.9187  | 1.8238   | 2.917   | 2.3586   | 4.2203  |
| JcLBD20 | 4.6592  | 1.4534   | 2.2798   | 4.2348  | 7.8787   | 2.1044   | 29.0017  | 32.1325 | 31.2627  | 33.8866 | 23.6776  | 57.7015 |
| JcLBD32 | 0       | 0.4785   | 0        | 0       | 0        | 0        | 14.4227  | 14.4009 | 8.2487   | 12.3535 | 10.2739  | 9.3487  |
| JcLBD26 | 0.6063  | 1.6984   | 0.1832   | 0       | 0.6961   | 1.4558   | 104.9921 | 153.577 | 117.62   | 184.999 | 80.3794  | 62.6996 |
| JcLBD17 | 0       | 0        | 0.6991   | 0       | 0        | 0        | 0.771    | 0.715   | 0.7784   | 4.0505  | 0.2564   | 0.6934  |
| JcLBD15 | 1.1245  | 2.1922   | 0.2489   | 1.4825  | 0.7648   | 0.4855   | 2.1271   | 1.0028  | 2.5952   | 6.253   | 4.3094   | 3.3853  |

\* Expression values were TPM values and normalized by quantile normalization.

**Table S8.** Target genes for JcLBD transcription factors

| <b>Motif</b>  | <b>Target Genes</b>                                                                                                                                                                                                                                                                                                                                                                                                                                                                                                                                                                                                                                                                                                                                                                                                                                                                                                                                                                                                                                                                                                                                                                                                                                                                                                                                                                                                                                                                                                                    |
|---------------|----------------------------------------------------------------------------------------------------------------------------------------------------------------------------------------------------------------------------------------------------------------------------------------------------------------------------------------------------------------------------------------------------------------------------------------------------------------------------------------------------------------------------------------------------------------------------------------------------------------------------------------------------------------------------------------------------------------------------------------------------------------------------------------------------------------------------------------------------------------------------------------------------------------------------------------------------------------------------------------------------------------------------------------------------------------------------------------------------------------------------------------------------------------------------------------------------------------------------------------------------------------------------------------------------------------------------------------------------------------------------------------------------------------------------------------------------------------------------------------------------------------------------------------|
| Jcr4S00009.60 | jc012138, jc000384, jc010116, jc014050, jc001911, jc021062, jc023030, jc018751, jc014708, jc005542, jc002825, jc007763, jc021106, jc022172, jc001513, jc020192, jc003193, jc005317, jc005639, jc001912, jc003981, jc005937, jc008392, jc014865, jc011680, jc007113, jc024838, jc003564, jc022047, jc010191, jc015342, jc011300, jc015612, jc004630, jc018205, jc012116, jc008665, jc021558, jc016201, jc003764, jc008444, jc025263, jc011386, jc009001, jc005981, jc020924, jc005861, jc013092, jc000771, jc023760, jc014955, jc005335, jc005855, jc022048, jc001018, jc019697, jc024585, jc016899, jc007995, jc025266, jc002195, jc010375, jc005982, jc010187, jc023281, jc001823, jc008639, jc005074, jc016209, jc024875, jc024584, jc009307, jc025639, jc014377, jc025569, jc003999, jc022050, jc001165, jc010024, jc019730, jc006415, jc002823, jc022071, jc017629, jc008845, jc018650, jc016805, jc017664, jc009485, jc002661, jc001113, jc005316, jc014293, jc000746, jc018963, jc010604, jc023373, jc002861, jc021560, jc018695, jc019804, jc019713, jc024549, jc010462, jc019411, jc003121, jc006879, jc020298, jc008723, jc009796, jc025753, jc014119, jc002282, jc015785, jc024941, jc015611, jc016729, jc023978, jc003590, jc013795, jc018100, jc018885, jc021840, jc021566, jc023029, jc008025, jc021105, jc003348, jc002692, jc008048, jc012352, jc004079, jc024331, jc001903, jc001764, jc024337, jc000009, jc010142, jc011678, jc010186, jc013222, jc016213, jc018383, jc015525, jc000411, jc000710, jc004637, jc011387 |
| Jcr4S00803.60 | jc025266, jc023373, jc001906, jc001911, jc008665, jc017629, jc018885, jc022071, jc019730, jc002823, jc002825, jc011680, jc001903, jc011678, jc019804, jc025263, jc000746, jc006947                                                                                                                                                                                                                                                                                                                                                                                                                                                                                                                                                                                                                                                                                                                                                                                                                                                                                                                                                                                                                                                                                                                                                                                                                                                                                                                                                     |
| Jcr4S13769.10 | jc009307, jc018100, jc001165, jc008025, jc010607, jc024584, jc022071, jc023978, jc020924, jc002661, jc010024, jc004630, jc023373, jc010116, jc014865, jc000746, jc020192, jc005335, jc005542, jc023281, jc004079, jc003193, jc015525, jc014708, jc002282, jc009001, jc019804, jc002195, jc000710, jc023029, jc023030, jc008444, jc022172, jc012504, jc025266, jc025569, jc005316, jc007763, jc014119, jc025263, jc011678, jc000771, jc010604, jc013092, jc012116, jc024426, jc001903, jc002825, jc005317, jc019730, jc025639, jc003999, jc007113, jc001018, jc024337, jc021806, jc012138, jc002823, jc013222, jc002692, jc017664, jc001911, jc008723, jc005074, jc020298, jc017629, jc000384, jc011680, jc018885                                                                                                                                                                                                                                                                                                                                                                                                                                                                                                                                                                                                                                                                                                                                                                                                                       |

**Table S9.** RNA-seq samples in 6 tissues of *J. curcas*

| Name          | Tissue         | Development stage | SRR        | Reference   |
|---------------|----------------|-------------------|------------|-------------|
| fruit         | Seed endosperm | Immature fruit    | SRR5974841 | PRJNA399212 |
| male flower   | Male flower    | Fully open        | SRR5974843 | PRJNA399212 |
| female flower | Female flower  | Fully open        | SRR5974844 | PRJNA399212 |
| leaf          | Leaf           | Fully mature      | SRR5974846 | PRJNA399212 |
| root          | Root           | Fully expanded    | SRR5974855 | PRJNA399212 |
| stem          | Stem           | Fully mature      | SRR5974856 | PRJNA399212 |

**Table S10.** RNA-seq samples under stress of *J. curcas*.

| Name    | Tissue | Treatment | SRR        | Reference   |
|---------|--------|-----------|------------|-------------|
| C1dL-1  | Leaf   | Control   | SRR1542241 | PRJNA257901 |
| C1dL-2  | Leaf   | Control   | SRR1542253 | PRJNA257901 |
| D1dL-1  | Leaf   | Drought   | SRR1542247 | PRJNA257901 |
| D1dL-2  | Leaf   | Drought   | SRR1542259 | PRJNA257901 |
| C4dL-1  | Leaf   | Control   | SRR1542242 | PRJNA257901 |
| C4dL-2  | Leaf   | Control   | SRR1542254 | PRJNA257901 |
| D4dL-1  | Leaf   | Drought   | SRR1542248 | PRJNA257901 |
| D4dL-2  | Leaf   | Drought   | SRR1542260 | PRJNA257901 |
| C7dL-11 | Leaf   | Control   | SRR1542243 | PRJNA257901 |
| C7dL-21 | Leaf   | Control   | SRR1542255 | PRJNA257901 |
| D7dL-1  | Leaf   | Drought   | SRR1542249 | PRJNA257901 |
| D7dL-2  | Leaf   | Drought   | SRR1542261 | PRJNA257901 |
| C1dR-1  | Root   | Control   | SRR1542235 | PRJNA257901 |
| C1dR-2  | Root   | Control   | SRR1542250 | PRJNA257901 |
| D1dR-1  | Root   | Drought   | SRR1542244 | PRJNA257901 |
| D1dR-2  | Root   | Drought   | SRR1542256 | PRJNA257901 |
| C4dR-1  | Root   | Control   | SRR1542239 | PRJNA257901 |
| C4dR-2  | Root   | Control   | SRR1542251 | PRJNA257901 |
| D4dR-1  | Root   | Drought   | SRR1542245 | PRJNA257901 |
| D4dR-2  | Root   | Drought   | SRR1542257 | PRJNA257901 |
| C7dR-11 | Root   | Control   | SRR1542240 | PRJNA257901 |
| C7dR-21 | Root   | Control   | SRR1542252 | PRJNA257901 |
| D7dR-1  | Root   | Drought   | SRR1542246 | PRJNA257901 |
| D7dR-2  | Root   | Drought   | SRR1542258 | PRJNA257901 |
| C2hL-1  | Leaf   | Control   | SRR1251568 | PRJNA244896 |
| C2hL-2  | Leaf   | Control   | SRR1251963 | PRJNA244896 |
| S2hL-1  | Leaf   | Salt      | SRR1251958 | PRJNA244896 |
| S2hL-2  | Leaf   | Salt      | SRR1251969 | PRJNA244896 |
| C2dL-1  | Leaf   | Control   | SRR1251570 | PRJNA244896 |
| C2dL-2  | Leaf   | Control   | SRR1251965 | PRJNA244896 |
| S2dL-1  | Leaf   | Salt      | SRR1251960 | PRJNA244896 |
| S2dL-2  | Leaf   | Salt      | SRR1251971 | PRJNA244896 |

|        |      |         |            |             |
|--------|------|---------|------------|-------------|
| C7dL-1 | Leaf | Control | SRR1251572 | PRJNA244896 |
| C7dL-2 | Leaf | Control | SRR1251967 | PRJNA244896 |
| S7dL-1 | Leaf | Salt    | SRR1251962 | PRJNA244896 |
| S7dL-2 | Leaf | Salt    | SRR1251973 | PRJNA244896 |
| C2hR-1 | Root | Control | SRR1251567 | PRJNA244896 |
| C2hR-2 | Root | Control | SRR1251964 | PRJNA244896 |
| S2hR-1 | Root | Salt    | SRR1251957 | PRJNA244896 |
| S2hR-2 | Root | Salt    | SRR1251970 | PRJNA244896 |
| C2dR-1 | Root | Control | SRR1251569 | PRJNA244896 |
| C2dR-2 | Root | Control | SRR1251966 | PRJNA244896 |
| S2dR-1 | Root | Salt    | SRR1251959 | PRJNA244896 |
| S2dR-2 | Root | Salt    | SRR1251972 | PRJNA244896 |
| C7dR-1 | Root | Control | SRR1251571 | PRJNA244896 |
| C7dR-2 | Root | Control | SRR1251968 | PRJNA244896 |
| S7dR-1 | Root | Salt    | SRR1251961 | PRJNA244896 |
| S7dR-2 | Root | Salt    | SRR1251974 | PRJNA244896 |

---
